# Supplementary material for: Luminescent dysprosium single-molecule magnets made from designed chiral BINOL-derived bisphosphate ligands
Source: Royal Society of Chemistry journal article supplement (doi:10.1039/d0qi01193b), 2020-12-10
Supplement: d0qi01193b1.pdf [file d0qi01193b1.pdf]

## Supporting Information

# Luminescent Dysprosium Single-Molecule Magnets Made from Chiral BINOL-Derived Bisphosphate Ligands

Carlo Andrea Mattei,<sup>a</sup> Vincent Montigaud,<sup>a</sup> Vincent Dorcet,<sup>a</sup> François Riobé,<sup>b</sup> Gilles Argouarch,<sup>a</sup> Olivier Maury,<sup>b</sup> Boris Le Guennic,<sup>a</sup> Olivier Cador,<sup>a</sup> Claudia Lalli,<sup>\*a</sup> Fabrice Pointillart,<sup>\*a</sup>

<sup>a</sup> Univ Rennes, CNRS, ISCR (Institut des Sciences Chimiques de Rennes) - UMR 6226, 35000 Rennes, France

<sup>b</sup> Univ Lyon, Ens de Lyon, CNRS UMR 5182, Université Claude Bernard Lyon 1, Laboratoire de Chimie, F69342, Lyon, France

Corresponding author's email: [fabrice.pointillart@univ-rennes1.fr](mailto:fabrice.pointillart@univ-rennes1.fr)

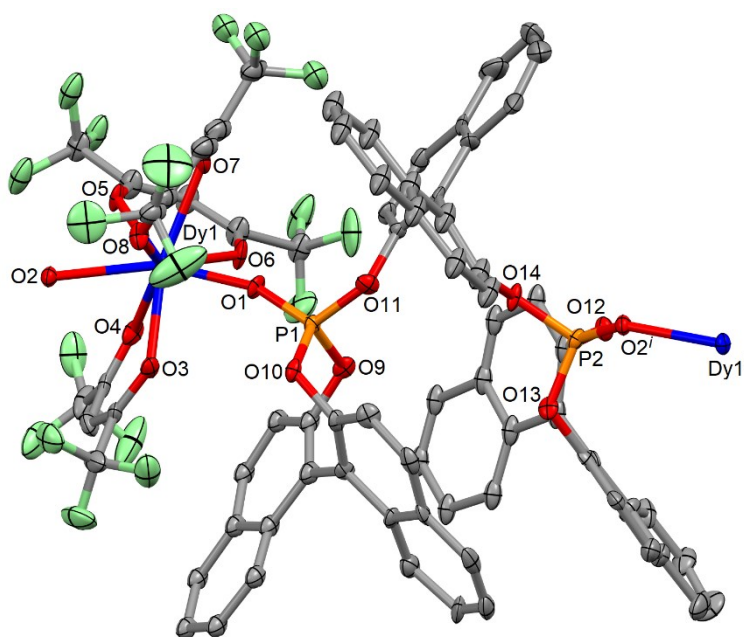

**Figure S1.** ORTEP view of the asymmetric unit for  $[(S)\text{-}2]_n$ . Thermal ellipsoids are drawn at 30% probability. Hydrogen atoms are omitted for clarity.

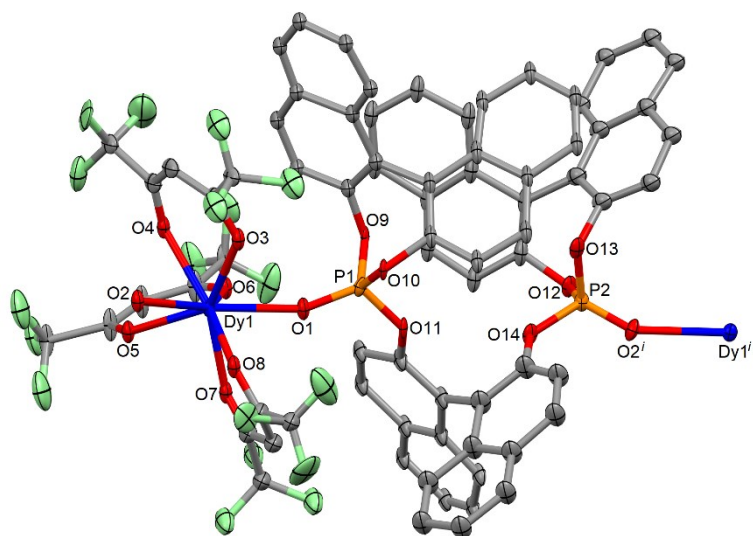

**Figure S2.** ORTEP view of the asymmetric unit for  $[(R)\text{-}2]_n$ . Thermal ellipsoids are drawn at 30% probability. Hydrogen atoms are omitted for clarity.

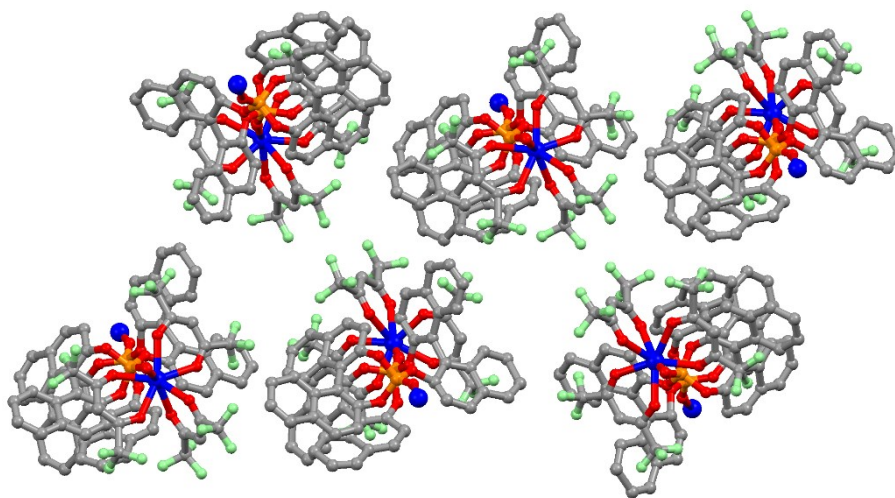

**Figure S3.** Crystal packing of  $[(R)\text{-}2]_n$  along the  $c$  axis.

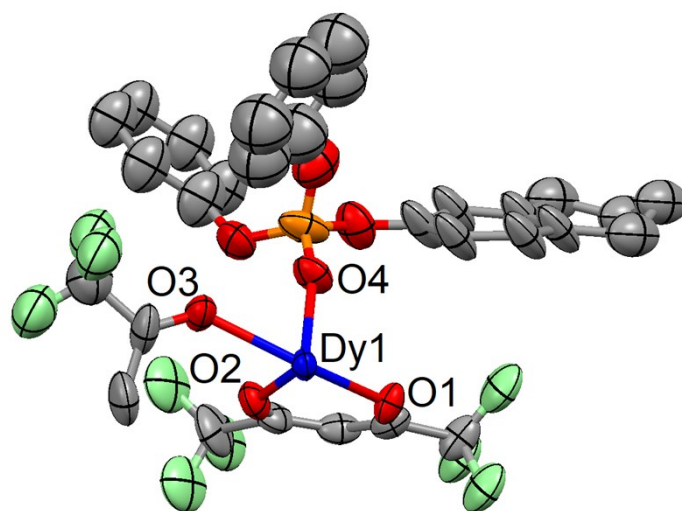

**Figure S4.** ORTEP view of the asymmetric unit for  $[(S)\text{-}3]_n$ . Thermal ellipsoids are drawn at 30% probability. Hydrogen atoms are omitted for clarity.

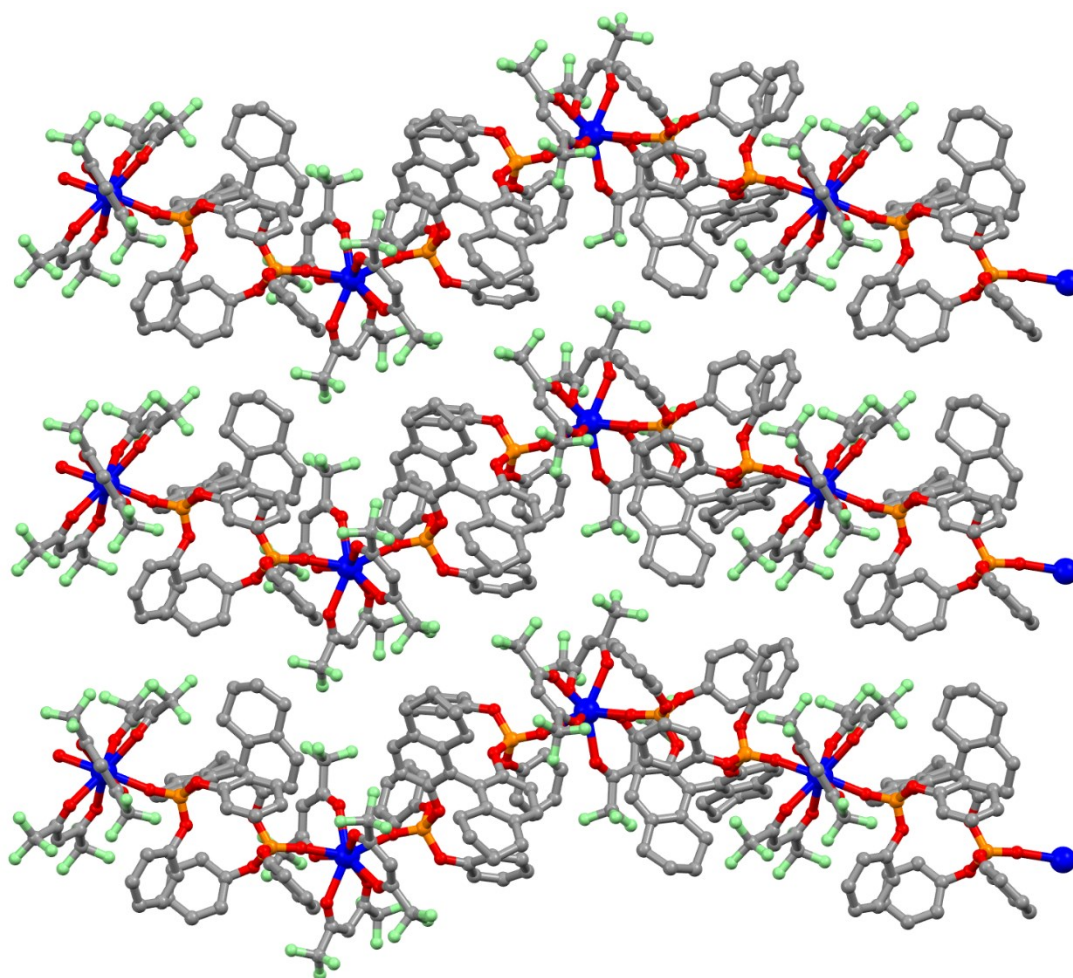

**Figure S5.** Crystal packing of  $[(S)\text{-}3]_n$  along the  $c$  axis.

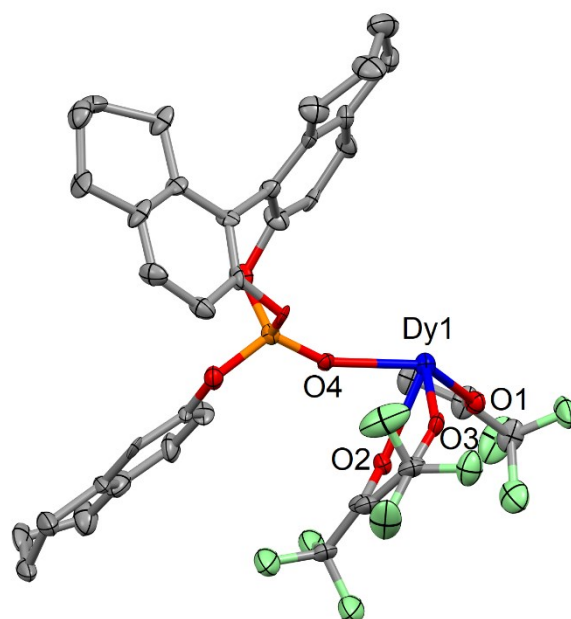

**Figure S6.** ORTEP view of the asymmetric unit for  $[(S)\text{-}4]_n$ . Thermal ellipsoids are drawn at 30% probability. Hydrogen atoms are omitted for clarity.

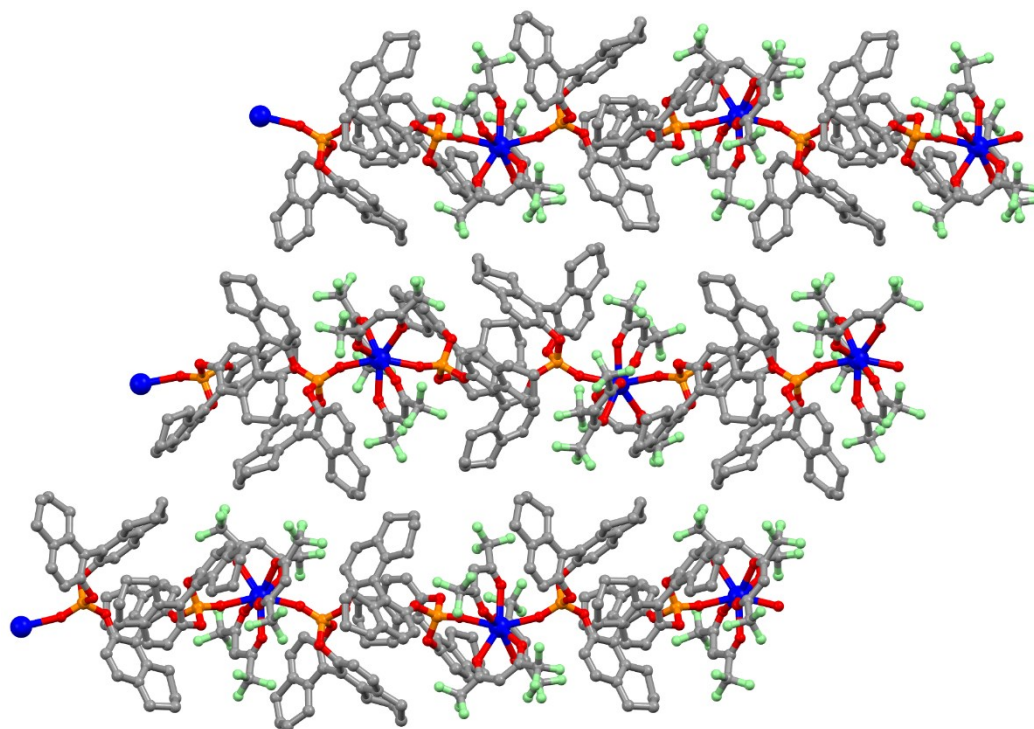

**Figure S7.** Crystal packing of  $[(S)\text{-}4]_n$  along the  $c$  axis.

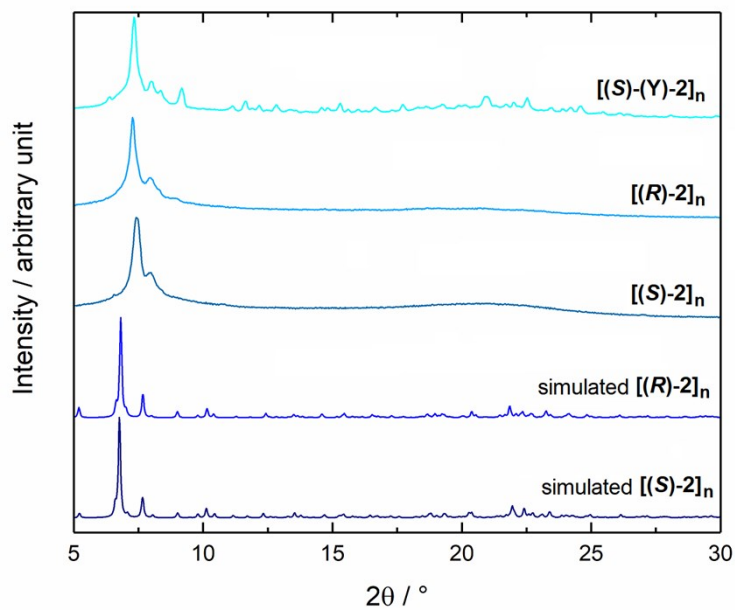

**Figure S8.** Superposition of experimental powder X-ray diffraction patterns from  $[(S)-2]_n$ ,  $[(R)-2]_n$  and the yttrium analogue  $[(S)-(Y)-2]_n$  measured at 300 K and simulated from  $[(S)-2]_n$  and  $[(R)-2]_n$  single-crystal data obtained at 150 K.

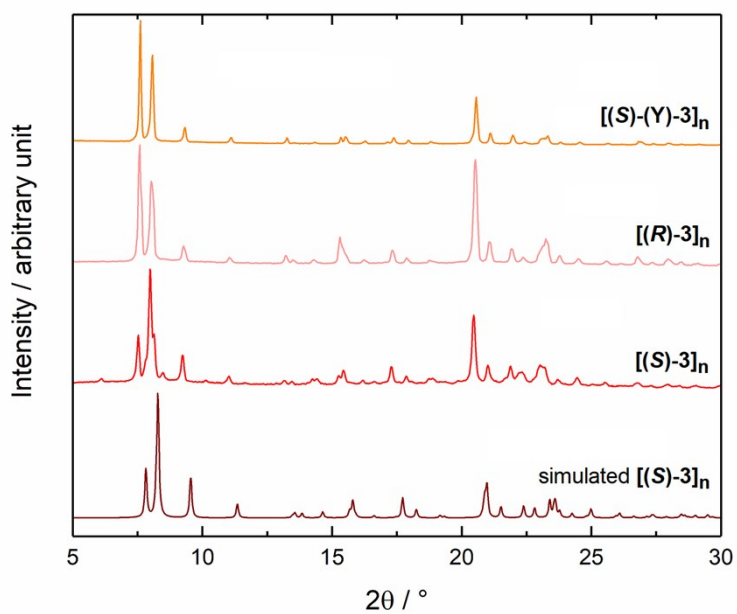

**Figure S9.** Superposition of experimental powder X-ray diffraction patterns from  $[(S)-3]_n$ ,  $[(R)-3]_n$  and the yttrium analogue  $[(S)-(Y)-3]_n$  measured at 300 K and simulated from  $[(S)-3]_n$  single-crystal data obtained at 150 K.



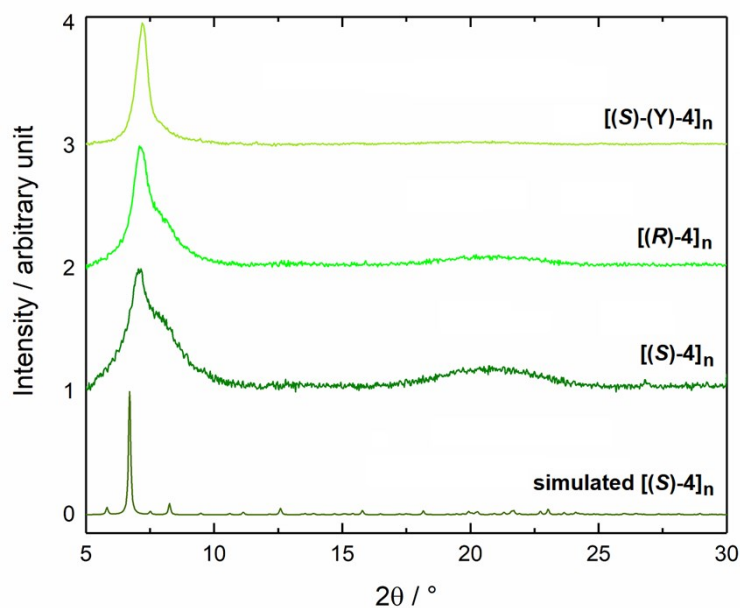

**Figure S10.** Superposition of experimental powder X-ray diffraction patterns from  $[(S)-4]_n$ ,  $[(R)-4]_n$  and the yttrium analogue  $[(S)-(Y)-4]_n$  measured at 300 K and simulated from  $[(S)-4]_n$  single-crystal data obtained at 150 K.

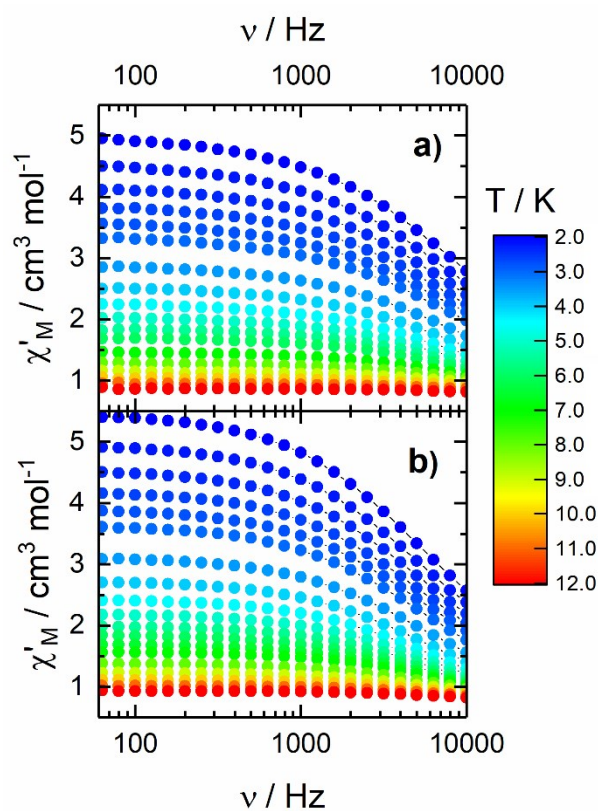

**Figure S11.** In phase component  $\chi_M'$  of the ac magnetic susceptibility data for  $[(S)-2]_n$  (a) and  $[(S)-3]_n$  (b) from 2 to 12 K under 0 Oe.

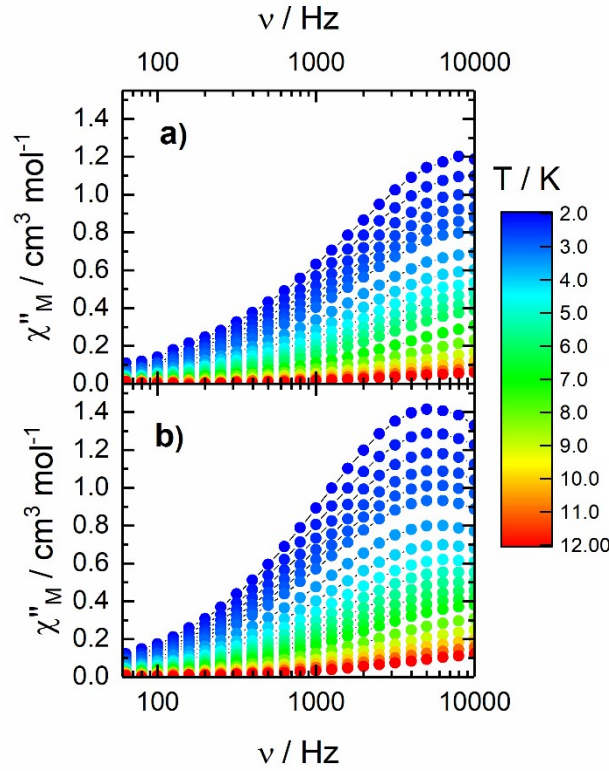

**Figure 12.** Out-of phase component  $\chi_M''$  of the ac magnetic susceptibility data for [(S)-2]<sub>n</sub> (a) and [(S)-3]<sub>n</sub> (b) from 2 to 12 K under 0 Oe.

#### Extended Debye model.

$$\chi_M' = \chi_S + (\chi_T - \chi_S) \frac{1 + (\omega\tau)^{1-\alpha} \sin\left(\alpha \frac{\pi}{2}\right)}{1 + 2(\omega\tau)^{1-\alpha} \sin\left(\alpha \frac{\pi}{2}\right) + (\omega\tau)^{2-2\alpha}}$$

$$\chi_M'' = (\chi_T - \chi_S) \frac{(\omega\tau)^{1-\alpha} \cos\left(\alpha \frac{\pi}{2}\right)}{1 + 2(\omega\tau)^{1-\alpha} \sin\left(\alpha \frac{\pi}{2}\right) + (\omega\tau)^{2-2\alpha}}$$

With  $\chi_T$  the isothermal susceptibility,  $\chi_S$  the adiabatic susceptibility,  $\tau$  the relaxation time and  $\alpha$  an empiric parameter which describe the distribution of the relaxation time. For SMM with only one relaxation time,  $\alpha$  is close to zero. The extended Debye model was applied to fit simultaneously the experimental variations of  $\chi_M'$  and  $\chi_M''$  with the frequency  $\nu$  of the oscillating field ( $\omega = 2\pi\nu$ ). Typically, only the temperatures for which a maximum on the  $\chi''$  vs.  $f$  curves, have been considered. The best fitted parameters  $\tau$ ,  $\alpha$ ,  $\chi_T$ ,  $\chi_S$  are listed in Tables S3-S10 with the coefficient of determination  $R^2$ .

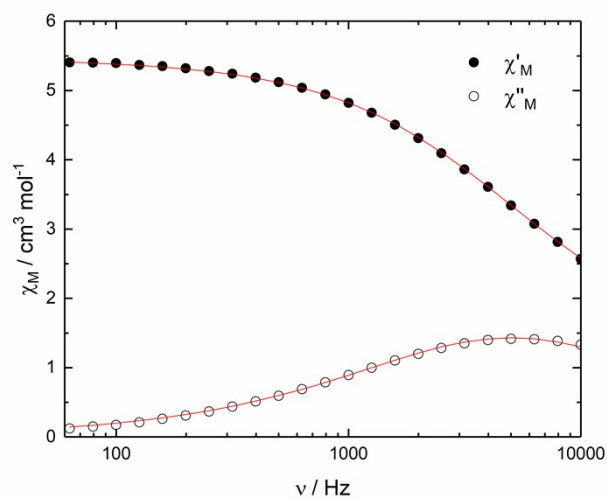

**Figure S13.** Frequency dependence of the in-phase ( $\chi_M'$ ) and out-of-phase ( $\chi_M''$ ) components of the ac susceptibility at 2 K and 0 Oe with the best fitted curves (red lines) for  $[(\mathbf{S})\text{-3}]_n$ .



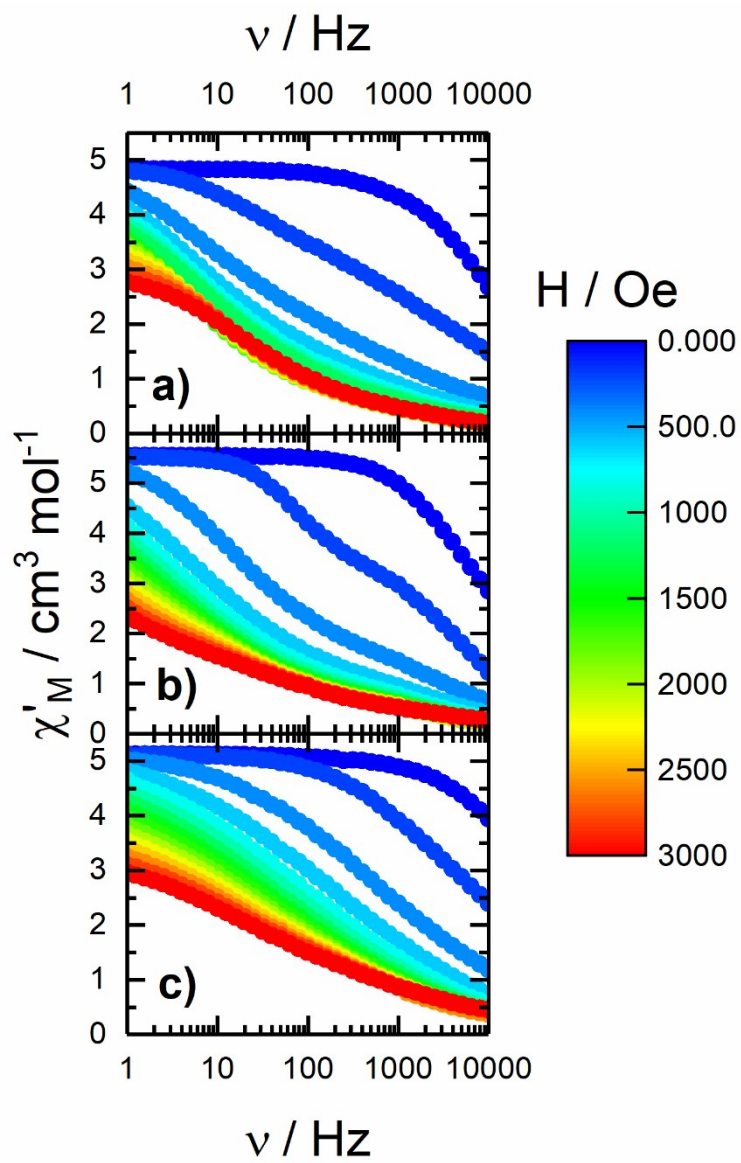

**Figure S14.** In-phase component of the ac magnetic susceptibility for  $[(S)\text{-}2]_n$  (a),  $[(S)\text{-}3]_n$  (b) and  $[(S)\text{-}4]_n$  (c) at 2 K under a DC magnetic field from 0 to 3000 Oe.

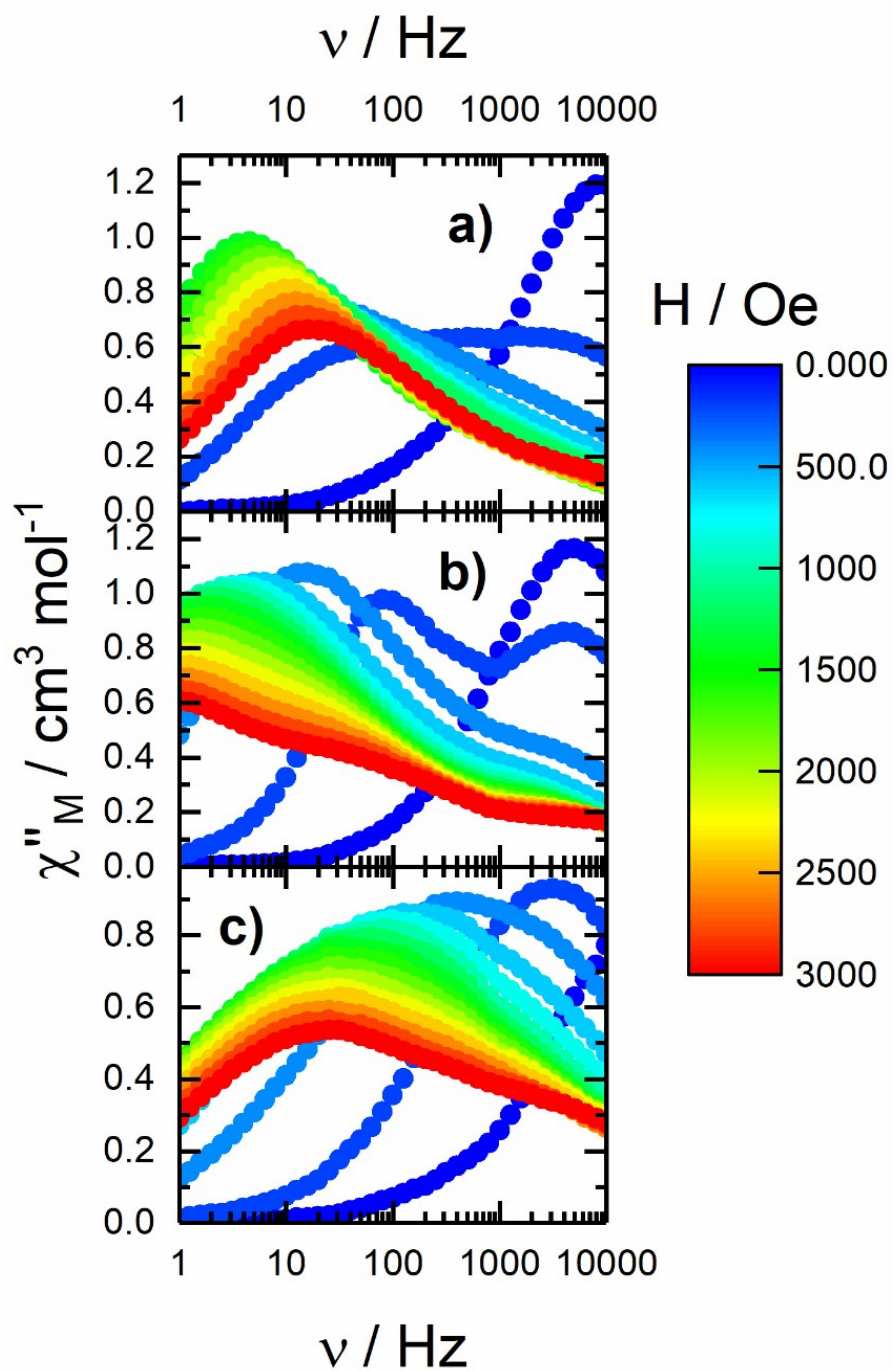

**Figure S15.** Out-of-phase components of the ac magnetic susceptibility for  $[(S)-2]_n$  (a),  $[(S)-3]_n$  (b) and  $[(S)-4]_n$  (c) at 2 K under a DC magnetic field from 0 to 3000 Oe.

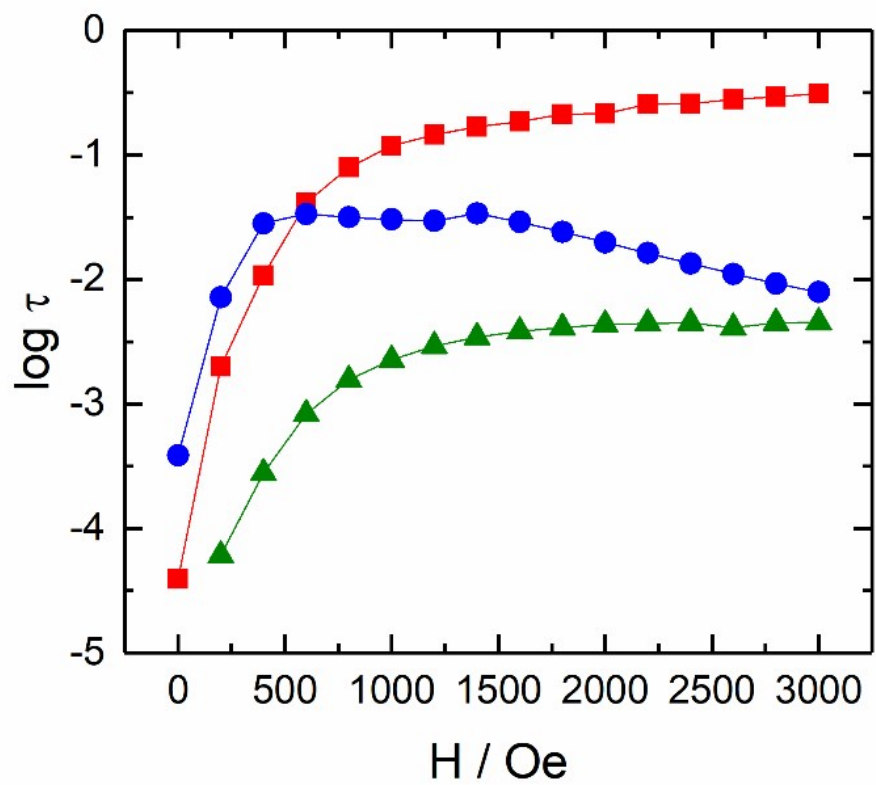

**Figure S16.** Field-dependence of the relaxation time of the magnetization for  $[(S)-2]_n$  (blue),  $[(S)-3]_n$  (red) and  $[(S)-4]_n$  (green) at 2 K under a DC magnetic field from 0 to 3000 Oe.

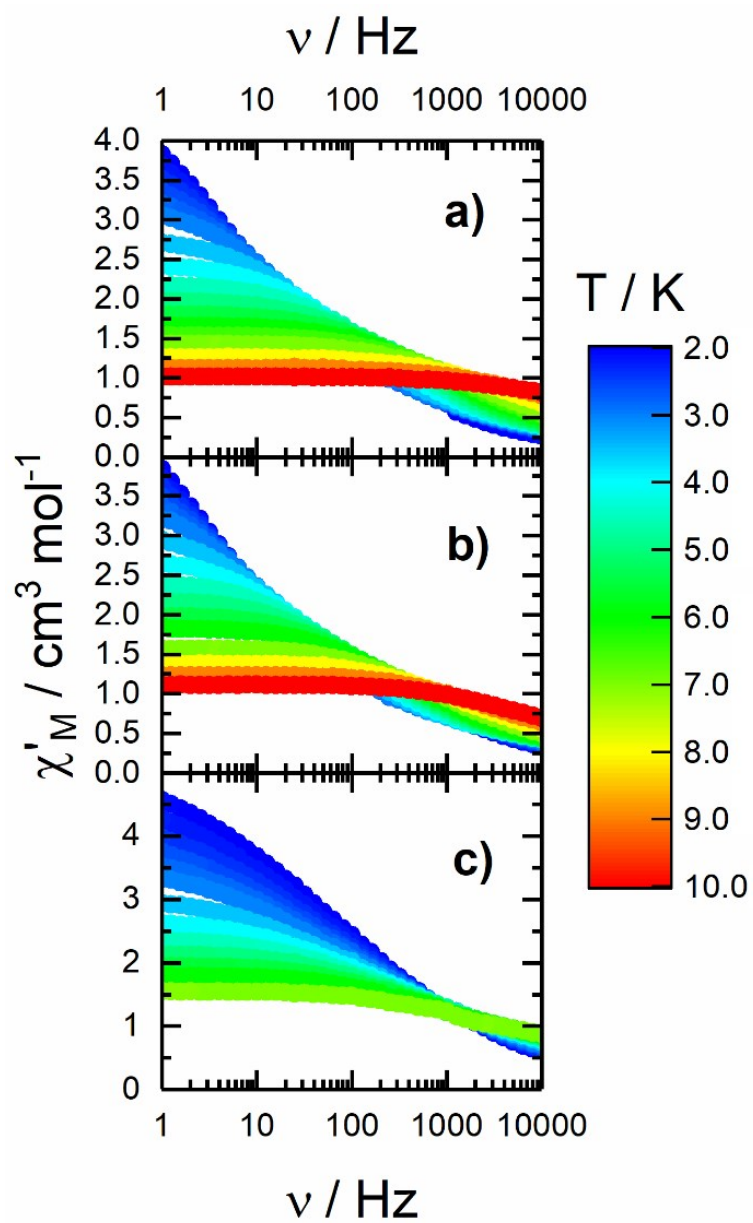

**Figure S17.** In-phase component of the ac magnetic susceptibility data for  $[(S)\text{-}2]_n$  (a),  $[(S)\text{-}3]_n$  (b) and  $[(S)\text{-}4]_n$  (c), from 2 to 10 K under 1000 Oe.

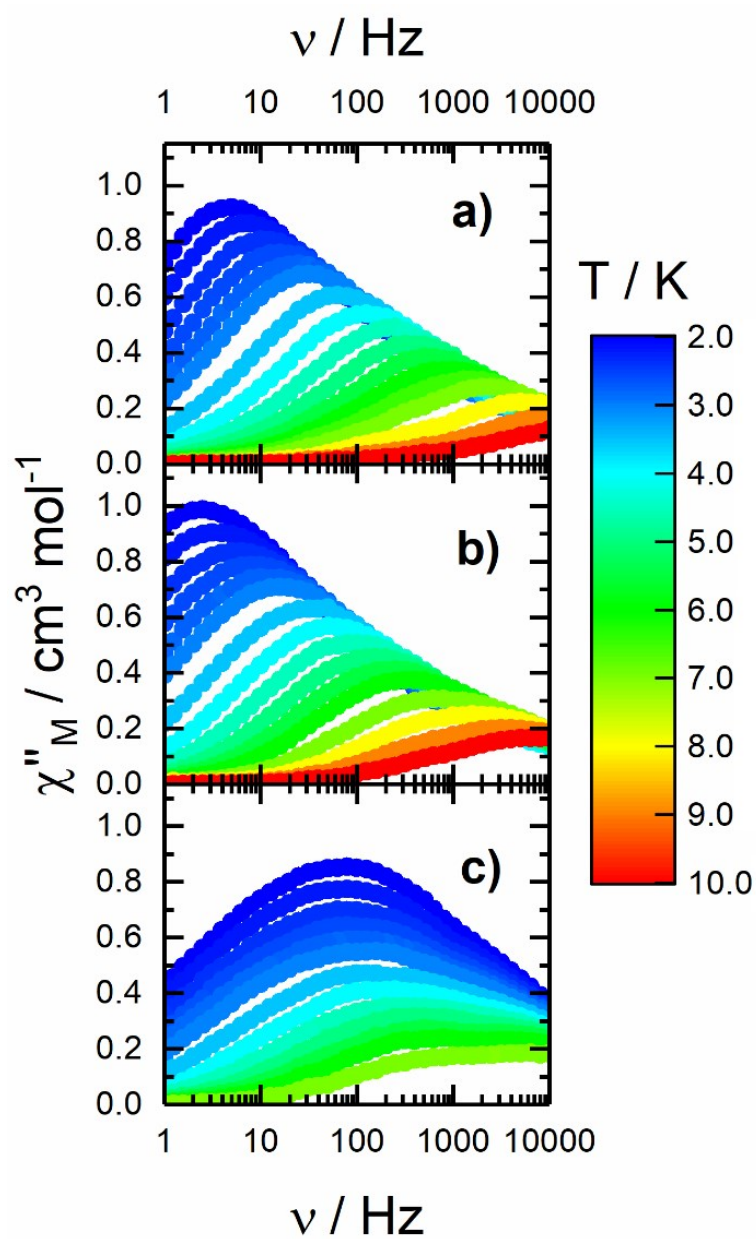

**Figure S18.** Frequency dependence of the out-of-phase component of the ac magnetic susceptibility data for [(S)-2]<sub>n</sub> (a), [(S)-3]<sub>n</sub> (b) and [(S)-4]<sub>n</sub> (c), from 2 to 10 K under 1000 Oe.



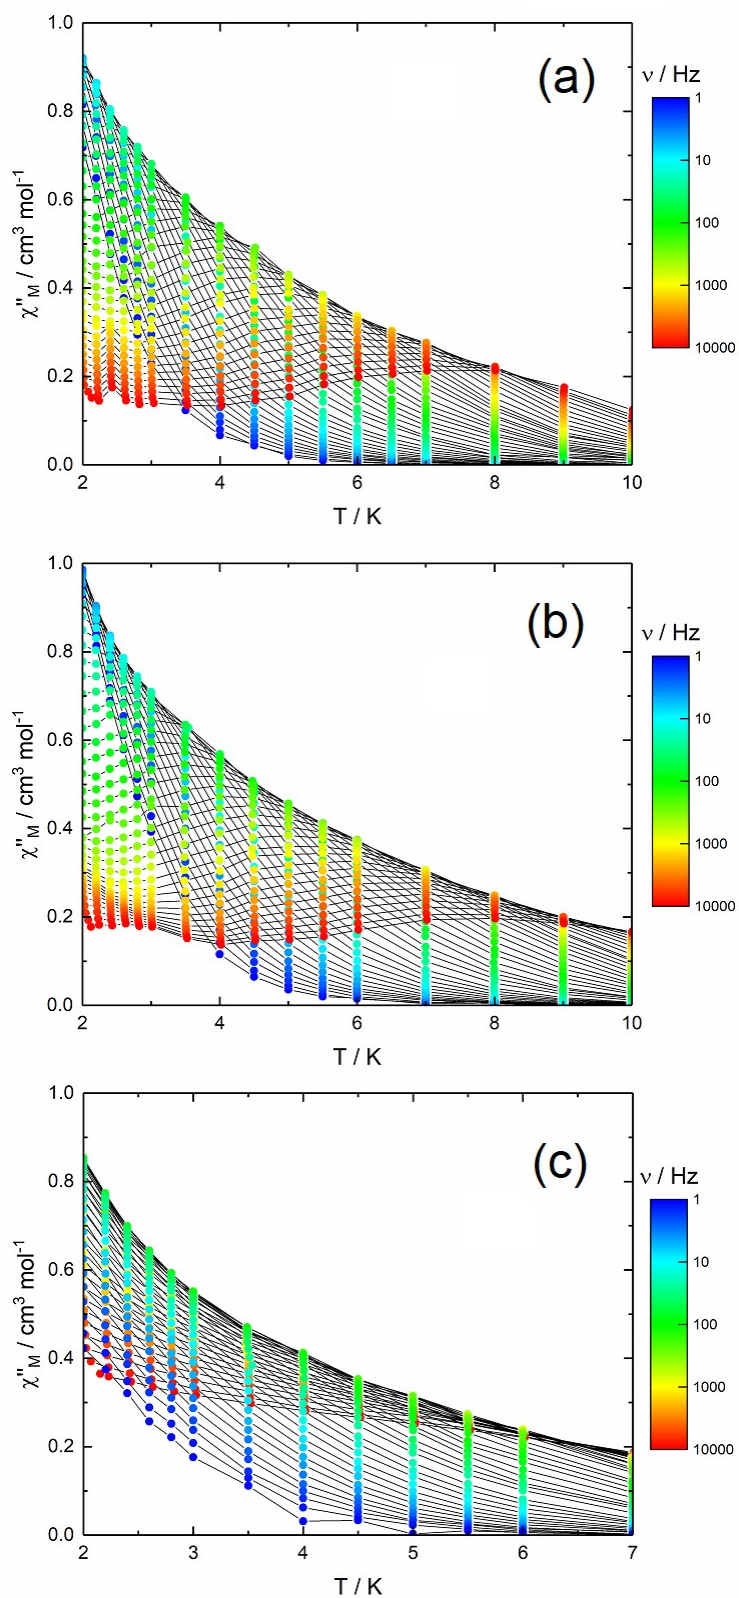

**Figure S19.** Thermal dependence of the out-of-phase component of the ac magnetic susceptibility data for  $[(S)\text{-}2]_n$  (a),  $[(S)\text{-}3]_n$  (b) and  $[(S)\text{-}4]_n$  (c), from 2 to 10 K under 1000 Oe.

**Extended Debye model used for [(S)-2]<sub>n</sub> and [(S)-3]<sub>n</sub> in 1000 Oe applied field at low temperature.**

$$\chi_M' = \chi_S + (\chi_T - \chi_S) \left\{ \frac{\beta \left[ 1 + (\omega\tau_1)^{1-\alpha_1} \sin\left(\frac{\pi}{2}\alpha_1\right) \right]}{1 + 2(\omega\tau_1)^{1-\alpha_1} \sin\left(\frac{\pi}{2}\alpha_1\right) + (\omega\tau_1)^{2(1-\alpha_1)}} + \frac{(1-\beta) \left[ 1 + (\omega\tau_2)^{1-\alpha_2} \sin\left(\frac{\pi}{2}\alpha_2\right) \right]}{1 + 2(\omega\tau_2)^{1-\alpha_2} \sin\left(\frac{\pi}{2}\alpha_2\right) + (\omega\tau_2)^{2(1-\alpha_2)}} \right\}$$

$$\chi_M'' = (\chi_T - \chi_S) \left\{ \frac{\beta \left[ (\omega\tau_1)^{1-\alpha_1} \cos\left(\frac{\pi}{2}\alpha_1\right) \right]}{1 + 2(\omega\tau_1)^{1-\alpha_1} \sin\left(\frac{\pi}{2}\alpha_1\right) + (\omega\tau_1)^{2(1-\alpha_1)}} + \frac{(1-\beta) \left[ (\omega\tau_2)^{1-\alpha_2} \cos\left(\frac{\pi}{2}\alpha_2\right) \right]}{1 + 2(\omega\tau_2)^{1-\alpha_2} \sin\left(\frac{\pi}{2}\alpha_2\right) + (\omega\tau_2)^{2(1-\alpha_2)}} \right\}$$

With  $\chi_T$  the isothermal susceptibility,  $\chi_S$  the adiabatic susceptibility,  $\tau$  the relaxation time and  $\alpha$  an empiric parameter which describe the distribution of the relaxation time. For SMM with only one relaxing object  $\alpha$  is close to zero. The extended Debye model was applied to fit simultaneously the experimental variations of  $\chi_M'$  and  $\chi_M''$  with the frequency  $\nu$  of the oscillating field ( $\omega = 2\pi\nu$ ). The best fitted parameters  $\tau_1$ ,  $\alpha_1$ ,  $\chi_{1T}$ ,  $\chi_{1S}$ ,  $\tau_2$ ,  $\alpha_2$ ,  $\chi_{2T}$  and  $\chi_{2S}$  are listed in Tables S8 and S9 with the coefficient of determination  $R^2$ .  $\tau_1$ ,  $\alpha_1$ ,  $\chi_{1T}$ ,  $\chi_{1S}$  are parameters for the high frequency contribution while  $\tau_2$ ,  $\alpha_2$ ,  $\chi_{2T}$  and  $\chi_{2S}$  are for the low frequency contribution.

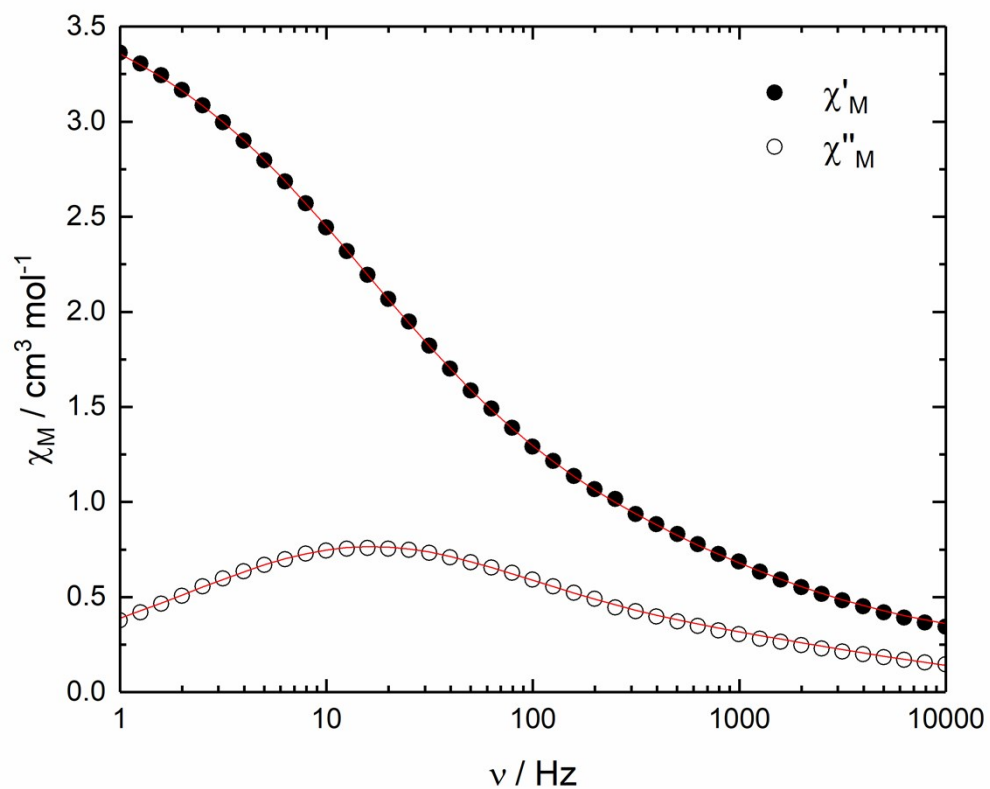

**Figure S20.** Frequency dependence of the in-phase ( $\chi_M'$ ) (full circles) and out-of-phase ( $\chi_M''$ ) (open circles) components of the ac susceptibility at 2.6 K and 1000 Oe with the best fitted curves (red lines) for  $[(S)\text{-}2]_n$ .

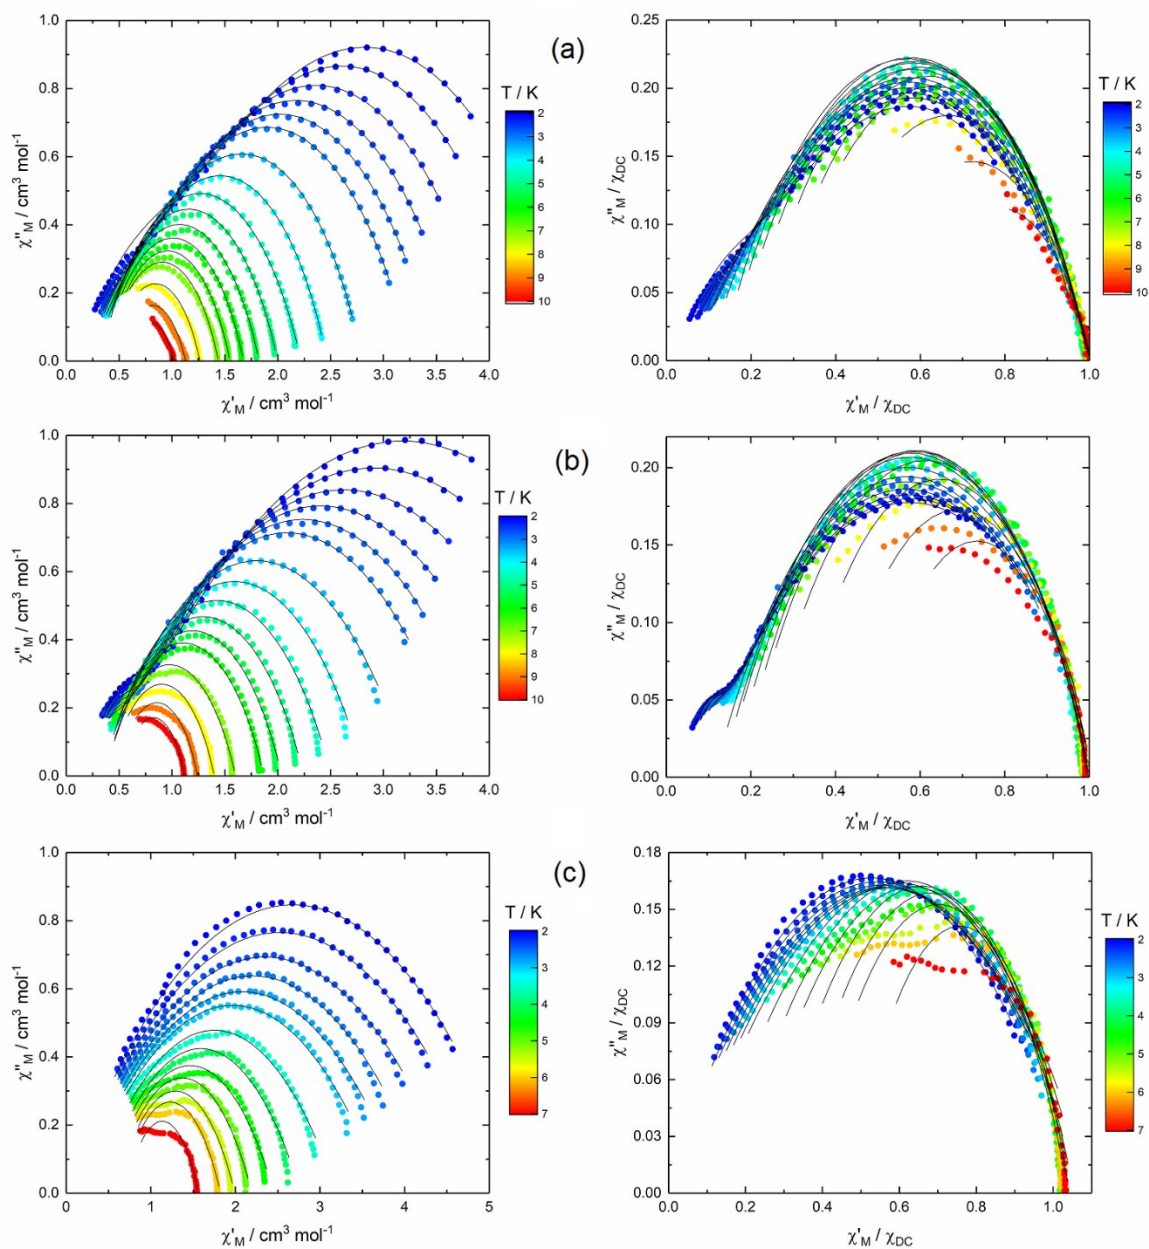

**Figure S21.** Cole-Cole plots (left) and normalized Cole-Cole plots (right) for [(S)-2]<sub>n</sub> (a), [(S)-2]<sub>n</sub> (b) and [(S)-4]<sub>n</sub> (c). Full black lines are the best fits using extended Debye model detailed in the text.

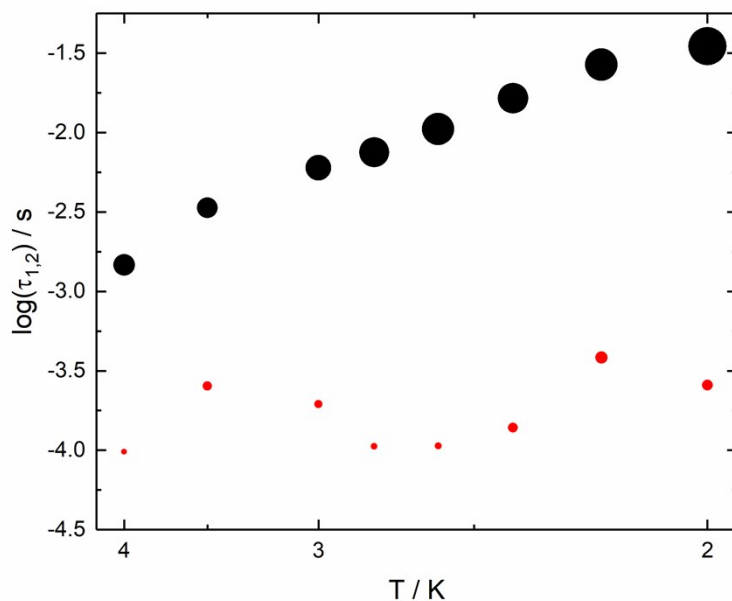

**Figure S22.** Arrhenius plots of the temperature dependence of the relaxation time in 1000 Oe applied magnetic field for  $[(S)-2]_n$  for the LF contribution (black dots) and the HF contribution (red dots). Size of the dots is representative of the ratio between the LF and HF contributions.

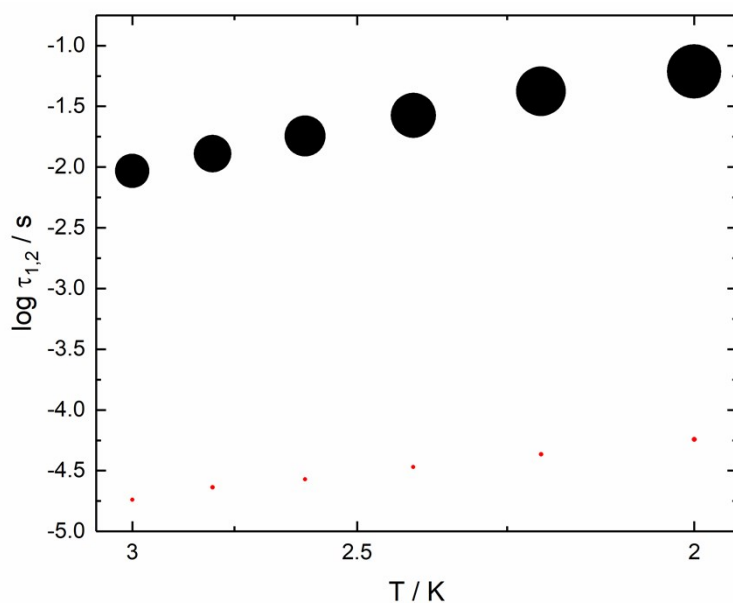

**Figure S23.** Arrhenius plots of the temperature dependence of the relaxation time in 1000 Oe applied magnetic field for  $[(S)-2]_n$  for the LF contribution (black dots) and the HF contribution (red dots). Size of the dots is representative of the ratio between the LF and HF contributions.



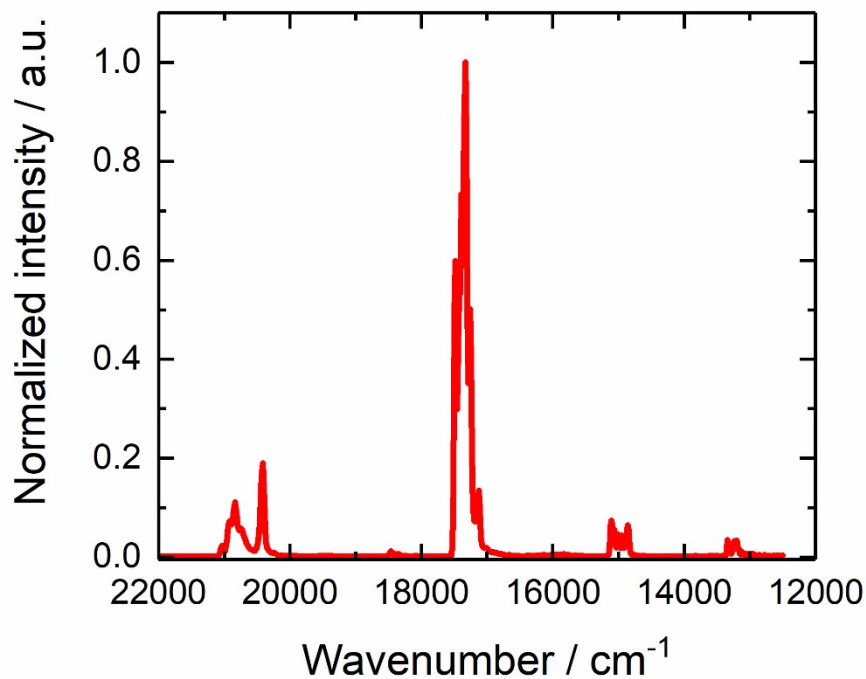

**Figure S24.** Emission spectrum at 10 K under an irradiation of  $29400\text{ cm}^{-1}$  (340 nm) for  $[(S)\text{-}3]_n$  in solid-state.

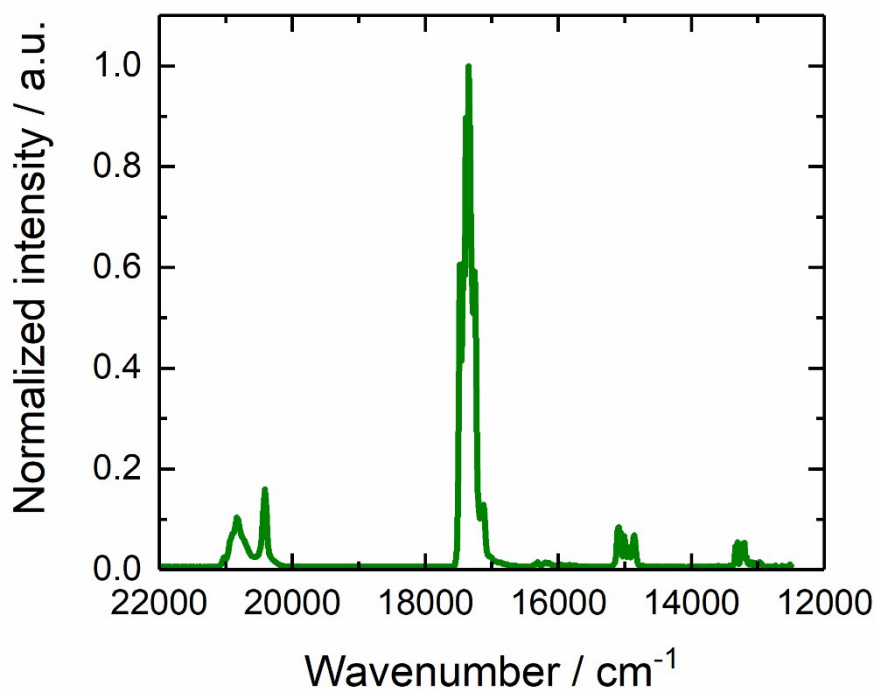

**Figure S25.** Emission spectrum at 10 K under an irradiation of  $28570\text{ cm}^{-1}$  (350 nm) for  $[(S)\text{-}4]_n$  in solid-state.

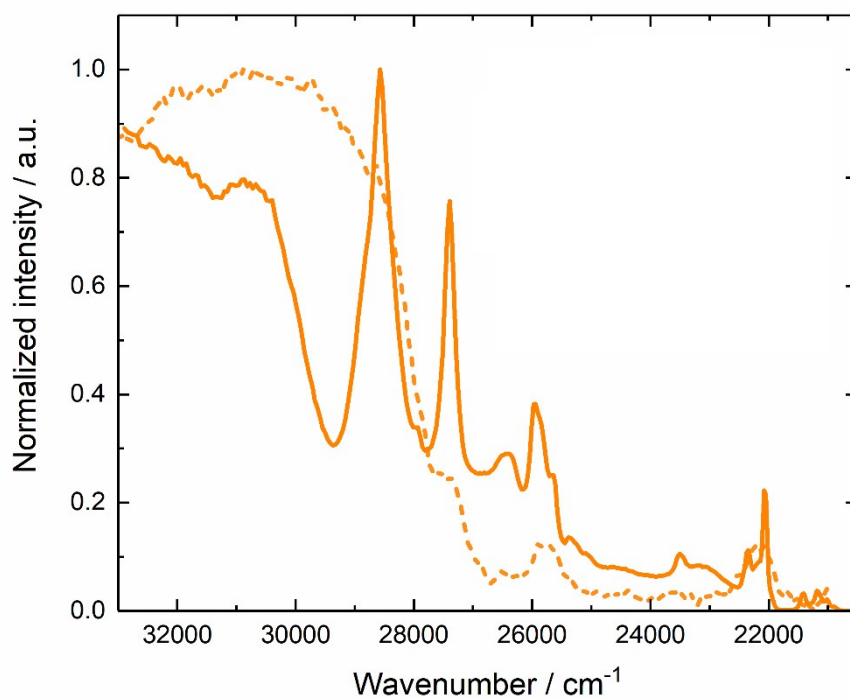

**Figure S26.** Excitation spectra of [(S)-3]<sub>n</sub> in solid-state at room temperature (dashed orange line) and 77 K (full orange line) recorded under an excitation at 17390 cm<sup>-1</sup> (575 nm).

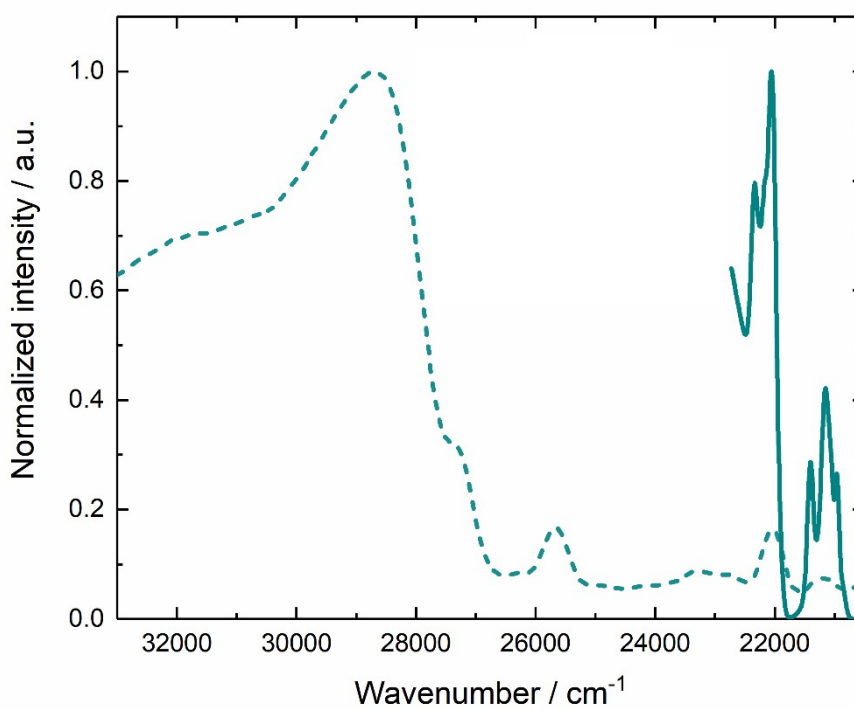

**Figure S27.** Excitation spectra of [(S)-4]<sub>n</sub> in solid-state at room temperature (dashed green line) and 77 K (full green line) recorded under an excitation at 17390 cm<sup>-1</sup> (575 nm).

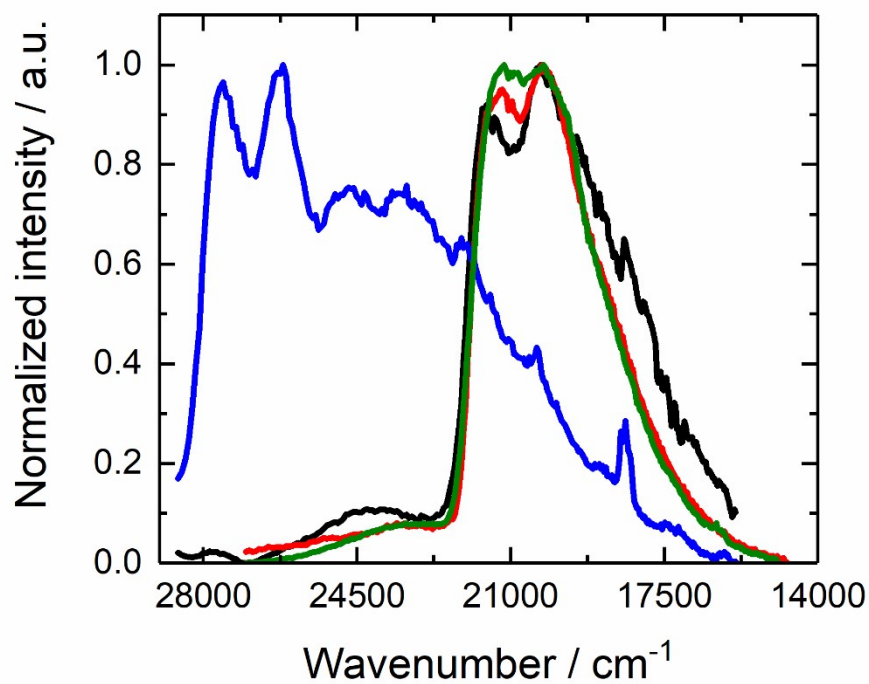

**Figure S28.** Phosphorescence spectra at 77 K for the Y(III) analogues of [(*S*)-1]<sub>n</sub> (black), [(*S*)-2]<sub>n</sub> (blue), [(*S*)-3]<sub>n</sub> (red) and [(*S*)-4]<sub>n</sub> (green) in the visible range for an irradiation of 29400 cm<sup>-1</sup> (340 nm) in solid-state.

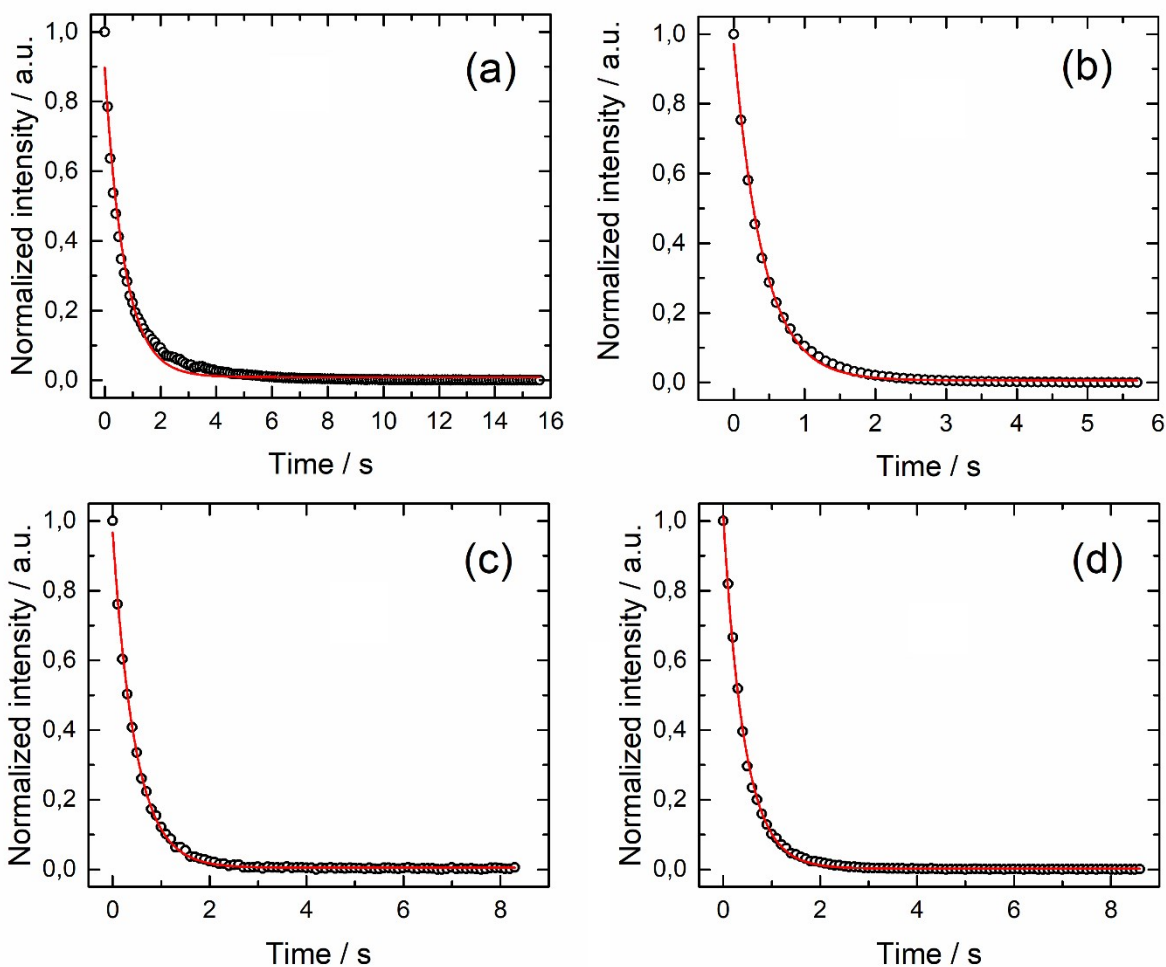

**Figure S29.** Phosphorescence decay for the Y(III) analogues of [(S)-1]<sub>n</sub> (a), [(S)-2]<sub>n</sub> (b), [(S)-3]<sub>n</sub> (c) and [(S)-4]<sub>n</sub> (d) recorded at 20408 cm<sup>-1</sup> (490 nm) for the Y(III) analogue of [(S)-1]<sub>n</sub>, 27027 cm<sup>-1</sup> (370 nm) for the Y(III) analogue of [(S)-2]<sub>n</sub> and 20202 cm<sup>-1</sup> (495 nm) for the Y(III) analogues of [(S)-3]<sub>n</sub> and [(S)-4]<sub>n</sub> in solid-state at 77 K under 30303 cm<sup>-1</sup> (330 nm) excitation for the Y(III) analogues of [(S)-1]<sub>n</sub> and [(S)-2]<sub>n</sub>; 28571 cm<sup>-1</sup> (350 nm) excitation for the Y(III) analogues of [(S)-3]<sub>n</sub> and [(S)-4]<sub>n</sub>.

**Table S1.** X-ray crystallographic data for  $[(S/R)-2]_n$ ,  $[(S)-3]_n$  and  $[(S)-4]_n$ .

| Compound                               | $[\text{Dy}(\text{hfac})_3(\text{S-L}^2)]_n \cdot (\text{C}_6\text{H}_{14})_2(\text{CH}_2\text{Cl}_2)_{0.5} \{[(S)-2] \cdot 2(\text{C}_6\text{H}_{14}) \cdot 0.5(\text{CH}_2\text{Cl}_2)\}_n$ | $[\text{Dy}(\text{hfac})_3(\text{R-L}^2)]_n \cdot (\text{C}_6\text{H}_{14})_2 \{[(R)-2] \cdot 2(\text{C}_6\text{H}_{14})\}_n$ | $[\text{Dy}(\text{hfac})_3(\text{S-L}^3)]_n \{[(S)-3]\}_n$         | $[\text{Dy}(\text{hfac})_3(\text{S-L}^4)]_n \{[(S)-4]\}_n$         |
|----------------------------------------|-----------------------------------------------------------------------------------------------------------------------------------------------------------------------------------------------|-------------------------------------------------------------------------------------------------------------------------------|--------------------------------------------------------------------|--------------------------------------------------------------------|
| Formula                                | $\text{C}_{87.5}\text{H}_{68}\text{DyF}_{18}\text{O}_{14}\text{P}_2$                                                                                                                          | $\text{C}_{87}\text{H}_{67}\text{DyF}_{18}\text{O}_{14}\text{P}_2$                                                            | $\text{C}_{59}\text{H}_{43}\text{DyF}_{18}\text{O}_{14}\text{P}_2$ | $\text{C}_{75}\text{H}_{63}\text{DyF}_{18}\text{O}_{14}\text{P}_2$ |
| M / g.mol <sup>-1</sup>                | 1945.3                                                                                                                                                                                        | 1902.8                                                                                                                        | 1542.4                                                             | 1754.7                                                             |
| Crystal system                         | Orthorhombic                                                                                                                                                                                  | Orthorhombic                                                                                                                  | Trigonal                                                           | Tetragonal                                                         |
| Space group                            | P2 <sub>1</sub> 2 <sub>1</sub> 2 <sub>1</sub> (N°19)                                                                                                                                          | P2 <sub>1</sub> 2 <sub>1</sub> 2 <sub>1</sub> (N°19)                                                                          | P3112 (N°151)                                                      | P4122 (N°91)                                                       |
| Cell parameters                        | a = 15.8446(14) Å<br>b = 23.038(2) Å<br>c = 24.956(2) Å                                                                                                                                       | a = 15.6774(19) Å<br>b = 23.028(3) Å<br>c = 25.162(3) Å                                                                       | a = 13.0421(13) Å<br>b = 13.0421 Å<br>c = 32.276(4) Å<br>γ = 120°  | a = 18.634(4) Å<br>b = 18.634 Å<br>c = 26.119(5) Å                 |
| Volume / Å <sup>3</sup>                | 9109.7(15)                                                                                                                                                                                    | 9083.9(19)                                                                                                                    | 4754.5(11)                                                         | 9069(4)                                                            |
| Z                                      | 4                                                                                                                                                                                             | 4                                                                                                                             | 3                                                                  | 4                                                                  |
| T / K                                  | 150(2)                                                                                                                                                                                        | 150(2)                                                                                                                        | 150(2)                                                             | 150(2)                                                             |
| 2θ range / °                           | 5.90 ≤ 2θ ≤ 54.97                                                                                                                                                                             | 2.40 ≤ 2θ ≤ 55.28                                                                                                             | 4.40 ≤ 2θ ≤ 55.06                                                  | 6.18 ≤ 2θ ≤ 54.96                                                  |
| ρ <sub>calc</sub> / g.cm <sup>-3</sup> | 1.418                                                                                                                                                                                         | 1.391                                                                                                                         | 1.616                                                              | 1.285                                                              |
| μ / mm <sup>-1</sup>                   | 0.980                                                                                                                                                                                         | 0.953                                                                                                                         | 1.344                                                              | 0.948                                                              |
| Number of reflections                  | 61598                                                                                                                                                                                         | 81372                                                                                                                         | 106375                                                             | 53524                                                              |
| Independent reflections                | 20096                                                                                                                                                                                         | 20851                                                                                                                         | 7271                                                               | 103016                                                             |
| R <sub>int</sub>                       | 0.0630                                                                                                                                                                                        | 0.1017                                                                                                                        | 0.0205                                                             | 0.1521                                                             |
| Fo <sup>2</sup> >                      | 16241                                                                                                                                                                                         | 16072                                                                                                                         | 6432                                                               | 5643                                                               |
| 2σ(Fo) <sup>2</sup>                    |                                                                                                                                                                                               |                                                                                                                               |                                                                    |                                                                    |
| Number of variables                    | 847                                                                                                                                                                                           | 534                                                                                                                           | 293                                                                | 462                                                                |
| Flack parameter                        | 0.06(2)                                                                                                                                                                                       | 0.10(3)                                                                                                                       | 0.023(6)                                                           | 0.03(4)                                                            |
| R <sub>1</sub> , ωR <sub>2</sub>       | 0.0949, 0.2417                                                                                                                                                                                | 0.1518, 0.3764                                                                                                                | 0.0837, 0.2349                                                     | 0.0994, 0.2219                                                     |

**Table S2.** SHAPE analysis of the coordination polyhedra around the lanthanide in the polymeric compounds.

| Compounds   | Metal | CShM <sub>SAPR-8</sub><br>(square antiprism D <sub>4d</sub> ) | CShM <sub>BTPR-8</sub><br>(biaugmented trigonal prism C <sub>2v</sub> ) | CShM <sub>TDD-8</sub><br>(triangular dodecahedro n D <sub>2d</sub> ) |
|-------------|-------|---------------------------------------------------------------|-------------------------------------------------------------------------|----------------------------------------------------------------------|
| $[(S)-2]_n$ | Dy1   | 0.142                                                         | 2.168                                                                   | 2.287                                                                |
| $[(R)-2]_n$ | Dy1   | 0.221                                                         | 2.017                                                                   | 1.988                                                                |
| $[(S)-3]_n$ | Dy1   | 0.310                                                         | 2.076                                                                   | 2.091                                                                |
| $[(S)-4]_n$ | Dy1   | 0.230                                                         | 2.465                                                                   | 2.311                                                                |



**Table S3.** Best fitted parameters ( $\chi_T$ ,  $\chi_S$ ,  $\tau$  and  $\alpha$ ) with the extended Debye model for compound [(S)-2]<sub>n</sub> at 0 Oe in the temperature range 2-8 K.

| T / K | $\chi_T / \text{cm}^3 \text{mol}^{-1}$ | $\chi_S / \text{cm}^3 \text{mol}^{-1}$ | $\alpha$ | $\tau / \text{s}$ | R <sup>2</sup> |
|-------|----------------------------------------|----------------------------------------|----------|-------------------|----------------|
| 2     | 4.98683                                | 1.09846                                | 0.30022  | 2.01E-05          | 0.99996        |
| 2.2   | 4.53996                                | 0.96466                                | 0.30199  | 1.91E-05          | 0.99996        |
| 2.4   | 4.17018                                | 0.87896                                | 0.30393  | 1.86E-05          | 0.99998        |
| 2.6   | 3.86414                                | 0.78978                                | 0.30954  | 1.80E-05          | 0.99998        |
| 2.8   | 3.60085                                | 0.66868                                | 0.3206   | 1.67E-05          | 0.99998        |
| 3     | 3.36192                                | 0.6992                                 | 0.31033  | 1.74E-05          | 0.99998        |
| 3.5   | 2.88742                                | 0.64318                                | 0.30319  | 1.70E-05          | 0.99998        |
| 4     | 2.53306                                | 0.58884                                | 0.29853  | 1.62E-05          | 0.99996        |
| 4.5   | 2.26644                                | 0.50167                                | 0.30908  | 1.46E-05          | 0.99997        |
| 5     | 2.04023                                | 0.4929                                 | 0.29683  | 1.40E-05          | 0.99997        |
| 5.5   | 1.85474                                | 0.44913                                | 0.29358  | 1.24E-05          | 0.99996        |
| 6     | 1.70621                                | 0.41654                                | 0.29779  | 1.10E-05          | 0.99998        |
| 7     | 1.47158                                | 0.36065                                | 0.31681  | 7.79E-06          | 0.99998        |
| 8     | 1.29215                                | 0.38523                                | 0.32506  | 5.85E-06          | 0.99996        |

**Table S4.** Best fitted parameters ( $\chi_T$ ,  $\chi_S$ ,  $\tau$  and  $\alpha$ ) with the extended Debye model for compound [(S)-3]<sub>n</sub> at 0 Oe in the temperature range 2-10 K.

| T / K | $\chi_T / \text{cm}^3 \text{mol}^{-1}$ | $\chi_S / \text{cm}^3 \text{mol}^{-1}$ | $\alpha$ | $\tau / \text{s}$ | R <sup>2</sup> |
|-------|----------------------------------------|----------------------------------------|----------|-------------------|----------------|
| 2     | 5.88299                                | 0.07277                                | 0.62095  | 0.03948           | 0.99866        |
| 2.2   | 5.03013                                | 0.20859                                | 0.57484  | 0.02205           | 0.99905        |
| 2.4   | 4.46807                                | 0.22202                                | 0.55203  | 0.01338           | 0.9988         |
| 2.6   | 3.99071                                | 0.26883                                | 0.51674  | 0.00864           | 0.99919        |
| 2.8   | 3.64331                                | 0.29503                                | 0.49057  | 0.00597           | 0.99942        |
| 3     | 3.37612                                | 0.29731                                | 0.47411  | 0.00426           | 0.99947        |
| 3.5   | 2.86228                                | 0.3131                                 | 0.43554  | 2.07E-03          | 0.99963        |
| 4     | 2.49559                                | 0.32252                                | 0.40784  | 1.10E-03          | 0.99975        |
| 4.5   | 2.22046                                | 0.30896                                | 0.39424  | 6.25E-04          | 0.9997         |
| 5     | 1.99953                                | 0.31765                                | 0.37853  | 3.81E-04          | 0.99963        |
| 5.5   | 1.82361                                | 0.32133                                | 0.37486  | 2.44E-04          | 0.99971        |
| 6     | 1.67598                                | 0.34463                                | 0.36648  | 1.68E-04          | 0.99965        |
| 7     | 1.54807                                | 0.37241                                | 0.35879  | 1.16E-04          | 0.99972        |
| 8     | 1.43956                                | 0.37865                                | 0.36201  | 7.96E-05          | 0.99972        |
| 9     | 1.2641                                 | 0.42297                                | 0.36899  | 3.76E-05          | 0.99973        |
| 10    | 1.12821                                | 0.49336                                | 0.39172  | 1.85E-05          | 0.99977        |

**Table S5.** Best fitted parameters ( $\chi_T$ ,  $\chi_S$ ,  $\tau$  and  $\alpha$ ) with the extended Debye model for compound [(S)-2]<sub>n</sub> at 2 K in the magnetic field range 200-3000 Oe.

| H / Oe | $\chi_T / \text{cm}^3 \text{mol}^{-1}$ | $\chi_S / \text{cm}^3 \text{mol}^{-1}$ | $\tau / \text{s}$ | $\alpha$ | R <sup>2</sup> |
|--------|----------------------------------------|----------------------------------------|-------------------|----------|----------------|
| 200    | 5.34365                                | 0.19874                                | 1.77E-05          | 0.3209   | 0.99994        |
| 400    | 6.00397                                | 0.14406                                | 2.83E-04          | 0.66791  | 0.99915        |
| 600    | 5.98067                                | 0.11884                                | 0.00979           | 0.67136  | 0.99899        |
| 800    | 5.65849                                | 0.12364                                | 0.02414           | 0.6384   | 0.99883        |
| 1000   | 5.37934                                | 0.11618                                | 0.02667           | 0.60659  | 0.99886        |
| 1200   | 5.05318                                | 0.12797                                | 0.02548           | 0.58878  | 0.99898        |
| 1400   | 5.25678                                | 0.13902                                | 0.02188           | 0.56874  | 0.99921        |
| 1600   | 4.93726                                | 0.14187                                | 0.04402           | 0.54758  | 0.99783        |
| 1800   | 4.63564                                | 0.14811                                | 0.03458           | 0.5323   | 0.99791        |
| 2000   | 4.34417                                | 0.15271                                | 0.02697           | 0.51805  | 0.99795        |
| 2200   | 4.07876                                | 0.15487                                | 0.02084           | 0.50488  | 0.99805        |
| 2400   | 3.82825                                | 0.15856                                | 0.01628           | 0.49494  | 0.99816        |
| 2600   | 3.59809                                | 0.15526                                | 0.01283           | 0.48713  | 0.99835        |
| 2800   | 3.38488                                | 0.15158                                | 0.01021           | 0.48338  | 0.99851        |
| 3000   | 3.1862                                 | 0.14377                                | 0.00826           | 0.4829   | 0.99863        |

**Table S6.** Best fitted parameters ( $\chi_T$ ,  $\chi_S$ ,  $\tau$  and  $\alpha$ ) with the extended Debye model for compound [(S)-3]<sub>n</sub> at 2 K in the magnetic field range 200-3000 Oe.

| H / Oe | $\chi_T / \text{cm}^3 \text{mol}^{-1}$ | $\chi_S / \text{cm}^3 \text{mol}^{-1}$ | $\tau / \text{s}$ | $\alpha$ | R <sup>2</sup> |
|--------|----------------------------------------|----------------------------------------|-------------------|----------|----------------|
| 200    | 3.13626                                | 0.90005                                | 0.00199           | 0.13148  | 0.99982        |
| 400    | 4.57236                                | 0.42183                                | 0.01077           | 0.3966   | 0.99920        |
| 600    | 6.97938                                | 0.20506                                | 0.04126           | 0.62791  | 0.99970        |
| 800    | 7.11276                                | 0.13197                                | 0.07915           | 0.63434  | 0.99836        |
| 1000   | 7.21279                                | 0.09376                                | 0.11858           | 0.64092  | 0.99849        |
| 1200   | 7.12693                                | 0.08112                                | 0.14505           | 0.6433   | 0.99850        |
| 1400   | 7.01969                                | 0.06297                                | 0.16829           | 0.64906  | 0.99866        |
| 1600   | 6.85277                                | 0.05176                                | 0.18522           | 0.65495  | 0.99879        |
| 1800   | 6.77403                                | 0 (fixed)                              | 0.21286           | 0.66912  | 0.99890        |
| 2000   | 6.48608                                | 0 (fixed)                              | 0.21554           | 0.67505  | 0.99910        |
| 2200   | 6.36081                                | 0 (fixed)                              | 0.25512           | 0.68613  | 0.99929        |
| 2400   | 6.05243                                | 0 (fixed)                              | 0.25982           | 0.69375  | 0.99943        |
| 2600   | 5.78605                                | 0 (fixed)                              | 0.27872           | 0.70275  | 0.99945        |
| 2800   | 5.49398                                | 0 (fixed)                              | 0.29304           | 0.71189  | 0.99945        |
| 3000   | 5.20335                                | 0 (fixed)                              | 0.30995           | 0.72056  | 0.99940        |

**Table S7.** Best fitted parameters ( $\chi_T$ ,  $\chi_S$ ,  $\tau$  and  $\alpha$ ) with the extended Debye model for compound [(S)-4]<sub>n</sub> at 2 K in the magnetic field range 200-3000 Oe.

| H / Oe | $\chi_T / \text{cm}^3 \text{mol}^{-1}$ | $\chi_S / \text{cm}^3 \text{mol}^{-1}$ | $\tau / \text{s}$ | $\alpha$ | R <sup>2</sup> |
|--------|----------------------------------------|----------------------------------------|-------------------|----------|----------------|
| 200    | 5.15211                                | 1.45943                                | 6.08E-05          | 0.3924   | 0.9999         |
| 400    | 5.25932                                | 0.24842                                | 2.79E-04          | 0.55163  | 0.99988        |
| 600    | 5.28121                                | 0 (fixed)                              | 8.33E-04          | 0.59261  | 0.99989        |
| 800    | 5.19076                                | 0 (fixed)                              | 0.00156           | 0.59375  | 0.9998         |
| 1000   | 5.08812                                | 0 (fixed)                              | 0.00226           | 0.59668  | 0.99982        |
| 1200   | 4.98715                                | 0 (fixed)                              | 0.00291           | 0.60072  | 0.99986        |
| 1400   | 4.87559                                | 0 (fixed)                              | 0.00345           | 0.60573  | 0.99988        |
| 1600   | 4.74707                                | 0 (fixed)                              | 0.00382           | 0.60968  | 0.9998         |
| 1800   | 4.61535                                | 0 (fixed)                              | 0.0041            | 0.61421  | 0.99975        |
| 2000   | 4.49569                                | 0 (fixed)                              | 0.00435           | 0.62181  | 0.99977        |
| 2200   | 4.3549                                 | 0 (fixed)                              | 0.00443           | 0.62833  | 0.9996         |
| 2400   | 4.20441                                | 0 (fixed)                              | 0.00446           | 0.63338  | 0.99965        |
| 2600   | 3.9811                                 | 0 (fixed)                              | 0.00411           | 0.62891  | 0.99938        |
| 2800   | 3.91274                                | 0 (fixed)                              | 0.00448           | 0.64979  | 0.99943        |
| 3000   | 3.77056                                | 0 (fixed)                              | 0.00451           | 0.65875  | 0.99913        |

**Table S8.** Best fitted parameters ( $\chi_{T,1}$ ,  $\chi_S$ ,  $\tau_1$ ,  $\alpha_1$ ,  $\chi_{T,2}$ ,  $\tau_2$ , and  $\alpha_2$ ) with the extended Debye model for compound [(S)-2]<sub>n</sub> at 1000 Oe accounting for two relaxation times in the temperature range 2-4 K and for one relaxation time in the temperature range 4.5-10 K.

| T / K | $\chi_{T,1} / \text{cm}^3 \text{mol}^{-1}$ | $\chi_S / \text{cm}^3 \text{mol}^{-1}$ | $\tau_1 / \text{s}$ | $\alpha_1$ | $\chi_{T,2} / \text{cm}^3 \text{mol}^{-1}$ | $\tau_2 / \text{s}$ | $\alpha_2$ | R <sup>2</sup> |
|-------|--------------------------------------------|----------------------------------------|---------------------|------------|--------------------------------------------|---------------------|------------|----------------|
| 2     | 3.86760                                    | 0.15064                                | 3.49300E-02         | 0.43534    | 1.08402                                    | 2.57537E-04         | 0.40600    | 0.99976        |
| 2.2   | 3.30470                                    | 0.16945                                | 2.67300E-02         | 0.40901    | 1.25866                                    | 3.84271E-04         | 0.50916    | 0.99994        |
| 2.4   | 3.11405                                    | 0.06556                                | 1.64700E-02         | 0.41832    | 1.00668                                    | 1.38717E-04         | 0.54914    | 0.99996        |
| 2.6   | 3.27021                                    | 0.22678                                | 1.05400E-02         | 0.42125    | 0.71540                                    | 1.06640E-04         | 0.37707    | 0.99993        |
| 2.8   | 3.06454                                    | 0.25028                                | 7.51000E-03         | 0.41175    | 0.68240                                    | 1.05780E-04         | 0.38796    | 0.99992        |
| 3     | 2.61837                                    | 0.22277                                | 6.00000E-03         | 0.39099    | 0.86920                                    | 1.95419E-04         | 0.49623    | 0.99987        |
| 3.5   | 2.11902                                    | 0.28404                                | 3.35000E-03         | 0.35115    | 0.96371                                    | 2.53307E-04         | 0.42260    | 0.99988        |
| 4     | 2.22141                                    | 0.33819                                | 1.47000E-03         | 0.35959    | 0.58516                                    | 9.80544E-05         | 0.20930    | 0.99985        |
| 4.5   | 2.22046                                    | 0.30896                                | 6.25294E-04         | 0.39424    | —                                          | —                   | —          | 0.9997         |
| 5     | 1.99953                                    | 0.31765                                | 3.81079E-04         | 0.37853    | —                                          | —                   | —          | 0.99963        |
| 5.5   | 1.82361                                    | 0.32133                                | 2.44416E-04         | 0.37486    | —                                          | —                   | —          | 0.99971        |
| 6     | 1.67598                                    | 0.34463                                | 1.68455E-04         | 0.36648    | —                                          | —                   | —          | 0.99965        |
| 6.5   | 1.54807                                    | 0.37241                                | 1.16087E-04         | 0.35879    | —                                          | —                   | —          | 0.99972        |
| 7     | 1.43956                                    | 0.37865                                | 7.96390E-05         | 0.36201    | —                                          | —                   | —          | 0.99972        |
| 8     | 1.26410                                    | 0.42297                                | 3.75632E-05         | 0.36899    | —                                          | —                   | —          | 0.99973        |
| 9     | 1.12821                                    | 0.49336                                | 1.85135E-05         | 0.39172    | —                                          | —                   | —          | 0.99977        |
| 10    | 1.01824                                    | 0.57920                                | 1.20060E-05         | 0.39099    | —                                          | —                   | —          | 0.9999         |

**Table S9.** Best fitted parameters ( $\chi_{T,1}$ ,  $\chi_S$ ,  $\tau_1$ ,  $\alpha_1$ ,  $\chi_{T,2}$ ,  $\tau_2$ , and  $\alpha_2$ ) with the extended Debye model for compound [(S)-3]<sub>n</sub> at 1000 Oe accounting for two relaxation times in the temperature range 2-3 K and for one relaxation time in the temperature range 3.5-10 K.

| T / K | $\chi_{T,1} / \text{cm}^3 \text{mol}^{-1}$ | $\chi_S / \text{cm}^3 \text{mol}^{-1}$ | $\tau_1 / \text{s}$ | $\alpha_1$ | $\chi_{T,2} / \text{cm}^3 \text{mol}^{-1}$ | $\tau_2 / \text{s}$ | $\alpha_2$ | R <sup>2</sup> |
|-------|--------------------------------------------|----------------------------------------|---------------------|------------|--------------------------------------------|---------------------|------------|----------------|
| 2     | 5.49010                                    | 0.19814                                | 6.14300E-02         | 0.54724    | 0.54106                                    | 5.70629E-05         | 0.15059    | 0.99992        |
| 2.2   | 5.04753                                    | 0.19998                                | 4.20600E-02         | 0.54544    | 0.48417                                    | 4.29917E-05         | 0.10793    | 0.99996        |
| 2.4   | 4.58678                                    | 0.22725                                | 2.66300E-02         | 0.53161    | 0.44906                                    | 3.38742E-05         | 0.03284    | 0.99993        |
| 2.6   | 4.15808                                    | 0.23113                                | 1.80300E-02         | 0.51137    | 0.44838                                    | 2.68060E-05         | 0.03980    | 0.99996        |
| 2.8   | 3.80167                                    | 0.23608                                | 1.28800E-02         | 0.49138    | 0.45835                                    | 2.30314E-05         | 0.11359    | 0.99989        |
| 3     | 3.51877                                    | 0.22908                                | 9.28000E-03         | 0.47896    | 0.44674                                    | 1.82509E-05         | 0.14545    | 0.99992        |
| 3.5   | 3.24880                                    | 0.35437                                | 4.48000E-03         | 0.47558    | —                                          | —                   | —          | 0.99962        |
| 4     | 2.82241                                    | 0.35696                                | 2.42000E-03         | 0.44735    | —                                          | —                   | —          | 0.99965        |
| 4.5   | 2.50657                                    | 0.33878                                | 1.40000E-03         | 0.43444    | —                                          | —                   | —          | 0.99954        |
| 5     | 2.24675                                    | 0.34439                                | 8.63361E-04         | 0.41764    | —                                          | —                   | —          | 0.99955        |
| 5.5   | 2.03862                                    | 0.34802                                | 5.63566E-04         | 0.40464    | —                                          | —                   | —          | 0.99956        |
| 6     | 1.87075                                    | 0.33958                                | 3.76012E-04         | 0.39911    | —                                          | —                   | —          | 0.99958        |
| 7     | 1.59984                                    | 0.35473                                | 1.86353E-04         | 0.38437    | —                                          | —                   | —          | 0.99960        |
| 8     | 1.39920                                    | 0.40876                                | 1.06272E-04         | 0.36498    | —                                          | —                   | —          | 0.99967        |
| 9     | 1.24177                                    | 0.47261                                | 6.35764E-05         | 0.34999    | —                                          | —                   | —          | 0.99976        |
| 10    | 1.11824                                    | 0.53306                                | 4.00388E-05         | 0.32489    | —                                          | —                   | —          | 0.99981        |

**Table S10.** Best fitted parameters ( $\chi_T$ ,  $\chi_S$ ,  $\tau$  and  $\alpha$ ) with the extended Debye model for compound [(S)-4]<sub>n</sub> at 1000 Oe in the temperature range 2-7 K.

| T / K | $\chi_T / \text{cm}^3 \text{mol}^{-1}$ | $\chi_S / \text{cm}^3 \text{mol}^{-1}$ | $\alpha$ | $\tau / \text{s}$ | R <sup>2</sup> |
|-------|----------------------------------------|----------------------------------------|----------|-------------------|----------------|
| 2     | 5.34602                                | 0.00811                                | 0.6088   | 0.0025            | 0.99976        |
| 2.2   | 5.02146                                | 0.02543                                | 0.62137  | 0.0023            | 0.99982        |
| 2.4   | 4.63182                                | 0.06366                                | 0.62466  | 0.00195           | 0.99983        |
| 2.6   | 4.30186                                | 0.10807                                | 0.62392  | 0.00165           | 0.99978        |
| 2.8   | 4.01087                                | 0.14275                                | 0.62186  | 0.00135           | 0.99981        |
| 3     | 3.74656                                | 0.1886                                 | 0.61704  | 0.00114           | 0.99974        |
| 3.5   | 3.19865                                | 0.3006                                 | 0.59401  | 7.21E-04          | 0.99969        |
| 4     | 2.77348                                | 0.40971                                | 0.56072  | 4.85E-04          | 0.99956        |
| 4.5   | 2.45563                                | 0.47131                                | 0.54013  | 3.30E-04          | 0.99956        |
| 5     | 2.19463                                | 0.54623                                | 0.50346  | 2.44E-04          | 0.99953        |
| 5.5   | 1.9924                                 | 0.59118                                | 0.48461  | 1.85E-04          | 0.99952        |
| 6     | 1.82284                                | 0.63797                                | 0.45977  | 1.50E-04          | 0.9995         |
| 7     | 1.56033                                | 0.70927                                | 0.4129   | 1.02E-04          | 0.99947        |

**Table S11.** Energy splitting ( $\text{cm}^{-1}$ ) of the  ${}^6\text{H}_{15/2}$  multiplet state with wavefunction compositions and g factor values for each Kramer Doublet (KD) for  $\{[(\text{S})\text{-}2]\cdot 2(\text{C}_6\text{H}_{14})\cdot 0.5(\text{CH}_2\text{Cl}_2)\}_n$ ,  $[(\text{S})\text{-}3]_n$  and  $[(\text{S})\text{-}4]_n$ .

|                                                                                                                  | $\Delta E$ | $g_x$ | $g_y$ | $g_z$ | $ 15/2, M_J\rangle$                                              |
|------------------------------------------------------------------------------------------------------------------|------------|-------|-------|-------|------------------------------------------------------------------|
| <b><math>\{[(\text{S})\text{-}2]\cdot 2(\text{C}_6\text{H}_{14})\cdot 0.5(\text{CH}_2\text{Cl}_2)\}_n</math></b> |            |       |       |       |                                                                  |
| GS                                                                                                               | 0          | 0.00  | 0.00  | 19.48 | 94 $ \pm 15/2\rangle + 5  \pm 11/2\rangle$                       |
| ES1                                                                                                              | 64         | 0.03  | 0.08  | 16.92 | 59 $ \pm 13/2\rangle + 17  \pm 9/2\rangle + 17  \pm 11/2\rangle$ |
| ES2                                                                                                              | 106        | 9.49  | 7.36  | 2.99  | 19 $ \pm 7/2\rangle + 18  \pm 13/2\rangle + 18  \pm 11/2\rangle$ |
| ES3                                                                                                              | 130        | 7.33  | 5.42  | 0.61  | 25 $ \pm 7/2\rangle + 19  \pm 11/2\rangle + 15  \pm 9/2\rangle$  |
| ES4                                                                                                              | 155        | 2.62  | 3.43  | 11.90 | 36 $ \pm 1/2\rangle + 19  \pm 5/2\rangle + 18  \pm 3/2\rangle$   |
| ES5                                                                                                              | 181        | 0.21  | 0.49  | 15.39 | 26 $ \pm 3/2\rangle + 25  \pm 1/2\rangle + 17  \pm 5/2\rangle$   |
| ES6                                                                                                              | 204        | 0.15  | 0.23  | 18.69 | 25 $ \pm 3/2\rangle + 24  \pm 5/2\rangle + 19  \pm 1/2\rangle$   |
| ES7                                                                                                              | 517        | 0.00  | 0.00  | 19.85 | 26 $ \pm 9/2\rangle + 21  \pm 11/2\rangle + 21  \pm 7/2\rangle$  |
| <b><math>[(\text{S})\text{-}3]_n</math></b>                                                                      |            |       |       |       |                                                                  |
| GS                                                                                                               | 0          | 0.04  | 0.16  | 18.38 | 85 $ \pm 15/2\rangle + 8  \pm 9/2\rangle + 2  \pm 3/2\rangle$    |
| ES1                                                                                                              | 41         | 3.14  | 4.21  | 12.80 | 33 $ \pm 13/2\rangle + 29  \pm 11/2\rangle + 12  \pm 1/2\rangle$ |
| ES2                                                                                                              | 60         | 7.94  | 6.10  | 1.62  | 29 $ \pm 3/2\rangle + 22  \pm 1/2\rangle + 19  \pm 9/2\rangle$   |
| ES3                                                                                                              | 89         | 0.09  | 4.99  | 10.05 | 32 $ \pm 13/2\rangle + 27  \pm 5/2\rangle + 12  \pm 9/2\rangle$  |
| ES4                                                                                                              | 93         | 0.23  | 2.65  | 11.68 | 37 $ \pm 7/2\rangle + 23  \pm 9/2\rangle + 15  \pm 11/2\rangle$  |
| ES5                                                                                                              | 140        | 1.06  | 2.61  | 15.00 | 31 $ \pm 5/2\rangle + 27  \pm 3/2\rangle + 26  \pm 7/2\rangle$   |
| ES6                                                                                                              | 151        | 0.59  | 3.38  | 16.86 | 45 $ \pm 1/2\rangle + 30  \pm 3/2\rangle + 18  \pm 5/2\rangle$   |
| ES7                                                                                                              | 473        | 0.00  | 0.00  | 19.84 | 30 $ \pm 11/2\rangle + 26  \pm 9/2\rangle + 18  \pm 13/2\rangle$ |
| <b><math>[(\text{S})\text{-}4]_n</math></b>                                                                      |            |       |       |       |                                                                  |
| GS                                                                                                               | 0          | 0.18  | 0.39  | 18.28 | 82 $ \pm 15/2\rangle + 7  \pm 11/2\rangle + 5  \pm 13/2\rangle$  |
| ES1                                                                                                              | 23         | 2.09  | 2.54  | 16.58 | 24 $ \pm 11/2\rangle + 20  \pm 1/2\rangle + 16  \pm 13/2\rangle$ |
| ES2                                                                                                              | 48         | 9.12  | 6.78  | 3.34  | 32 $ \pm 3/2\rangle + 29  \pm 1/2\rangle + 12  \pm 13/2\rangle$  |
| ES3                                                                                                              | 59         | 3.61  | 3.93  | 4.82  | 27 $ \pm 3/2\rangle + 17  \pm 1/2\rangle + 16  \pm 9/2\rangle$   |
| ES4                                                                                                              | 94         | 8.72  | 7.27  | 0.03  | 27 $ \pm 13/2\rangle + 26  \pm 5/2\rangle + 20  \pm 9/2\rangle$  |
| ES5                                                                                                              | 116        | 9.64  | 7.58  | 1.47  | 25 $ \pm 7/2\rangle + 21  \pm 9/2\rangle + 17  \pm 3/2\rangle$   |
| ES6                                                                                                              | 135        | 2.55  | 3.95  | 14.45 | 38 $ \pm 7/2\rangle + 32  \pm 5/2\rangle + 15  \pm 3/2\rangle$   |
| ES7                                                                                                              | 473        | 0.00  | 0.00  | 19.83 | 33 $ \pm 11/2\rangle + 24  \pm 9/2\rangle + 22  \pm 13/2\rangle$ |

**Table S12.** TD-DFT calculated absorption energies and main compositions of the low-lying electronic transitions for (S)-L<sup>1</sup>. H and L represent the HOMO and LUMO, respectively. The theoretical values are evaluated at the PCM(CH<sub>2</sub>Cl<sub>2</sub>)-PBE0/SVP level of approximation.

| Energy exp (cm <sup>-1</sup> ) | Energy theo (cm <sup>-1</sup> ) | Osc.         | Transition                                  |
|--------------------------------|---------------------------------|--------------|---------------------------------------------|
| 31000                          | 32804                           | 0.14         | H→L (96%)                                   |
| 34500                          | 35643<br>36360                  | 0.05<br>0.06 | H→L+2 (25%)<br>H-1→L+1 (96%)<br>H-4→L (27%) |
| 38200                          | 41387                           | 0.06         | H-1→L+4 (33%)<br>H→L+2 (41%)                |
| 43000                          | 45410<br>45725                  | 0.70<br>0.35 | H-1→L+6 (19%)<br>H-8/-9→L+1 (41%)           |

**Table S13.** TD-DFT calculated absorption energies and main compositions of the low-lying electronic transitions for (S)-L<sup>2</sup>. H and L represent the HOMO and LUMO, respectively. The theoretical values are evaluated at the PCM(CH<sub>2</sub>Cl<sub>2</sub>)-PBE0/SVP level of approximation.

| Energy exp (cm <sup>-1</sup> ) | Energy theo (cm <sup>-1</sup> ) | Osc.              | Transition                                                                                                                          |
|--------------------------------|---------------------------------|-------------------|-------------------------------------------------------------------------------------------------------------------------------------|
| 31100                          | 31443                           | 0.12              | H-2→L (41%)<br>H-3→L+1 (48%)                                                                                                        |
| 33100                          | 31493                           | 0.31              | H-2→L+1 (44%)<br>H-1→L (48%)                                                                                                        |
| 34000                          | 31729<br>32630                  | 0.13<br>0.03      | H→L/+2 (31/61%)<br>H→L/+2 (31/61%)                                                                                                  |
| 36500                          | 36936<br>+<br>36971             | 0.06<br>+<br>0.04 | H-4→L+3(30%)<br>H-3→L+4(27%)<br>H-2→L+5(18%)<br>H-4→L+4 (30%)<br>H-3→L+3(31%)                                                       |
| 38200                          | 40037<br>+<br>40481             | 0.14<br>+<br>0.13 | H-6/-7→L (13/10%)<br>H-8/-9→L+1(8/9%)<br>H-6→L+4(10%)<br>H-8→L+3(8%)<br>H-9→L+1 (12%)<br>H-7→L(15%)<br>H-4→L+4(11%)<br>H-3→L+3 (9%) |
| 43500                          | /                               | /                 | /                                                                                                                                   |

**Table S14.** TD-DFT calculated absorption energies and main compositions of the low-lying electronic transitions for (S)-L<sup>3</sup>. H and L represent the HOMO and LUMO, respectively. The theoretical values are evaluated at the PCM(CH<sub>2</sub>Cl<sub>2</sub>)-PBE0/SVP level of approximation.

| Energy exp (cm <sup>-1</sup> ) | Energy theo (cm <sup>-1</sup> ) | Osc. | Transition                                |               |
|--------------------------------|---------------------------------|------|-------------------------------------------|---------------|
| 36500                          | 40560                           | 0.04 | H→L (63%)                                 |               |
|                                | 40768                           | 0.02 | H-1→L (61%)                               |               |
| 37500                          | 43465                           | 0.03 | H-2→L+1 (32%)                             |               |
|                                | 43638                           | 0.02 | H-3→L+7 (13%)<br>H-4→L (23%)<br>H→L (19%) |               |
| 38500                          | 45844                           | 0.04 | H→L+3 (43%)                               |               |
|                                | 46251                           | 0.06 | H-1→L+2 (48%)                             |               |
|                                | 46609                           | 0.04 | H→L+4 (42%)                               |               |
| 43000                          | 48847                           | 0.04 | H-4→L+3(30%)                              |               |
|                                | 48962                           | 0.04 | H-7→L+1(20%)                              |               |
|                                | 49237                           |      |                                           | H-3→L+5(15%)  |
|                                |                                 |      | 0.04                                      | H-3→L+5 (32%) |

**Table S15.** TD-DFT calculated absorption energies and main compositions of the low-lying electronic transitions for (S)-L<sup>4</sup>. H and L represent the HOMO and LUMO, respectively. The theoretical values are evaluated at the PCM(CH<sub>2</sub>Cl<sub>2</sub>)-PBE0/SVP level of approximation.

| Energy exp (cm <sup>-1</sup> ) | Energy theo (cm <sup>-1</sup> ) | Osc.                | Transition       |                  |
|--------------------------------|---------------------------------|---------------------|------------------|------------------|
| 38300                          | 39268                           | 0.06                | H-3→L (43%)      |                  |
| 40300                          | 40332                           | 0.02                | H-8→L+1 (29%)    |                  |
|                                | 40362                           | 0.03                | H-7→L (41%)      |                  |
| 41600                          | 41044                           | 0.14                | H-1/-5→L+1 (49%) |                  |
|                                | 41115                           | 0.38                |                  |                  |
| 43700                          | 45602                           | 0.26                | H-1→L+3/+4(38%)  |                  |
|                                | 45670                           | 0.22                | H-3→L(10%)       |                  |
|                                | 46198                           |                     | 0.12             | H/-2→L+3(21%)    |
|                                |                                 |                     |                  | H-7→L+2 (16%)    |
|                                |                                 |                     |                  | H-3→L+3/+4 (41%) |
| 46256                          | 0.13                            | H-2/-4→L+3/+4 (42%) |                  |                  |



**Table S16.** DFT calculated relative energy of the low-lying triplet state  $T_1$  with respect to the  $S_0$  ground state of  $L^2$ ,  $L^3$  and  $L^4$ .

| Ligands    | $T_1$ relative energy ( $\text{cm}^{-1}$ ) |
|------------|--------------------------------------------|
| (S)- $L^2$ | 20813                                      |
| (S)- $L^3$ | 27587                                      |
| (S)- $L^4$ | 25633                                      |
